# Supplementary material for: Nature of a Long Carbon–Carbon Bond Beyond 2.0 Å
Source: Research Square preprint supplement (doi:10.21203/rs.3.rs-320873/v1), 2021-03-23
Supplement: Supplementary file 1 [file 4b13aa570a7724b3c4edaa4b.pdf]

# Supplementary Information for

## Nature of a Long Carbon–Carbon Bond Beyond 2.0 Å

Takashi Kubo, Yuki Suga, Daisuke Hashizume, Hiroki Suzuki, Tatsuya Miyamoto,  
Hiroshi Okamoto, Ryohei Kishi, and Masayoshi Nakano

Correspondence to: kubo@chem.sci.osaka-u.ac.jp (T.K.); hashi@riken.jp (D.H.)

### Table of Contents

|                                                                                                                                                        |         |
|--------------------------------------------------------------------------------------------------------------------------------------------------------|---------|
| <b>Materials and Methods</b> .....                                                                                                                     | S2–S4   |
| <b>Scheme S1.</b> Synthetic route to <b>1</b> .....                                                                                                    | S5      |
| <b>Figure S1.</b> <sup>1</sup> H and <sup>13</sup> C NMR spectra of <b>3</b> .....                                                                     | S6      |
| <b>Figure S2.</b> ORTEP drawing of <b>3</b> •[Li(THF) <sub>4</sub> ] <sub>2</sub> .....                                                                | S7      |
| <b>Figure S3.</b> Experimental and theoretical Raman vibrational spectra of <b>1</b> .....                                                             | S8      |
| <b>Figure S4.</b> Crystal packing diagram of <b>1</b> .....                                                                                            | S9      |
| <b>Figure S5.</b> TD-B3LYP-D3/6-311+G** calculation results of <b>1</b> .....                                                                          | S10     |
| <b>Figure S6.</b> GIAO/B3LYP-D3/6-311+G** calculated <sup>13</sup> C chemical shifts of <b>1</b> .....                                                 | S11     |
| <b>Figure S7.</b> HONO and LUNO of <b>1</b> .....                                                                                                      | S12     |
| <b>Figure S8.</b> Temperature dependence of the lattice parameters ( <i>L</i> ) for <b>1</b> .....                                                     | S13     |
| <b>Figure S9.</b> Schematic drawing for the effect of the interlocked dimeric structure of <b>1</b> on the interatomic distance between C2 and C3..... | S14     |
| <b>Figure S10.</b> Optical reflectivity ( <i>R</i> ) spectra of <b>1</b> .....                                                                         | S15     |
| <b>Figure S11.</b> CP/MAS <sup>13</sup> C NMR spectra of powdered <b>1</b> .....                                                                       | S16     |
| <b>Figure S12.</b> Static model deformation density maps on the C1-C2-C3 plane of <b>1</b> , obtained by the B3LYP-D3/6-311+G** calculation .....      | S17     |
| <b>Figure S13.</b> Temperature dependence of the pyramidalization angle ( <i>θ<sub>p</sub></i> ) of C2 and C3 .....                                    | S18     |
| <b>Figure S14.</b> <sup>1</sup> H and <sup>13</sup> C NMR spectra of <b>2a</b> .....                                                                   | S19     |
| <b>Figure S15.</b> <sup>1</sup> H and <sup>13</sup> C NMR spectra of <b>2b</b> .....                                                                   | S20     |
| <b>Table S1.</b> Equilibrium structures of <b>1</b> calculated at different DFT levels of theory .....                                                 | S21     |
| <b>Summary of DFT calculations</b> .....                                                                                                               | S22–S30 |
| <b>X-ray crystallographic data</b> .....                                                                                                               | S31–S41 |
| <b>Figure S16.</b> Orbital scattering factors for carbon atom.....                                                                                     | S42     |

|                                                                                  |     |
|----------------------------------------------------------------------------------|-----|
| <b>Figure S17.</b> 3D-isosurface difference Fourier map of <b>1</b> at 90 K..... | S43 |
| <b>References</b> .....                                                          | S44 |

## Materials and Methods

### Materials

**General:** All experiments with air- or moisture-sensitive compounds were performed in anhydrous solvents under nitrogen atmosphere in well-dried glassware. 1,3-dimethyl-2-imidazolidinone (DMI) and tetrahydrofuran (THF) were purchased from KANTO Chemical Co., Inc., Japan as anhydrous solvents. Hexane was dried and distilled over calcium hydride under argon atmosphere. Column chromatography was performed with silica gel [Silica gel N60 (Kanto)]. <sup>1</sup>H NMR spectra were obtained on JEOL ECS400 spectrometer. <sup>13</sup>C NMR spectra were obtained on JEOL ECA500 spectrometers. Positive EI mass spectra was taken by using Shimadzu QP-5050 spectrometer. Data collection for X-ray crystal structure analyses for **1** were performed at 90 K and at 100 – 400 K with an interval of 50 K on RIGAKU AFC-8 diffractometer (Mo-K $\alpha$ ,  $\lambda$  = 0.71073 Å) equipped with a Saturn70 CCD detector. Details for X-ray electron density distribution analysis of **1** at 90 K is described below. Data collection for conventional X-ray crystal structure analyses for **2a** and **3** were performed at 150 K and 200 K, respectively, on a Rigaku/Varimax diffractometer (Mo-K $\alpha$ ,  $\lambda$  = 0.71075 Å). The structures were solved with a direct method and refined with a full-matrix least squares method. Raman spectra were recorded on JASCO NRS-3100T spectrometer.

**9,9'-((9*H*-fluoren-9-ylidene)methylene)bis(9*H*-fluorene) (**2**):** 9-(dibromomethylene)-9*H*-fluorene (332 mg, 0.988 mmol), fluorene (598 mg, 3.60 mmol), and dried NaO*t*Bu were added to 1,3-dimethyl-2-imidazolidinone (DMI, 10 ml). After stirring for 24 h at room temperature, the reaction was quenched with water and the reaction mixture was extracted with dichloromethane (DCM). The combined organic layer was dried over Na<sub>2</sub>SO<sub>4</sub> and evaporated in vacuo. The residue was purified by column chromatography on silica gel [DCM/*n*-hexane (1:9 v/v)] to give **2** (218 mg, 0.431 mmol, 43%) as colorless powder. **2** was obtained as a mixture of stereoisomers, **2a** and **2b**. **2a**: <sup>1</sup>H NMR (400 MHz, DMSO-*d*<sub>6</sub>)  $\delta$  8.25 (d, *J* = 7.7 Hz, 2H), 8.13 (dd, *J* = 7.7, 1.0 Hz, 2H), 7.50 (t, *J* = 7.4 Hz, 2H), 7.38 (d, *J* = 7.7 Hz, 4H), 7.33 (dt, *J* = 7.7, 1.1 Hz, 2H), 7.15 (t, *J* = 7.4 Hz, 4H), 6.84 (dt, *J* = 7.4, 1.0 Hz, 4H), 6.70 (d, *J* = 7.7 Hz, 4H), 6.05 (s, 2H); <sup>13</sup>C NMR (126 MHz, DMSO-*d*<sub>6</sub>)  $\delta$  146.9, 143.0, 141.3, 140.0, 138.8, 137.9, 128.1, 127.9, 126.6, 126.3, 125.8, 125.2, 120.0, 119.5, 51.9; EI-MS *m/z* 506 (M<sup>+</sup>); analysis (calcd., found for C<sub>40</sub>H<sub>26</sub>): C (94.83, 94.80), H(5.17, 5.38). **2b**: <sup>1</sup>H NMR (400 MHz, DMSO-*d*<sub>6</sub>)  $\delta$  8.51 (d, *J* = 6.7 Hz, 2H), 7.96 (dd, *J* = 6.2, 1.8 Hz, 2H), 7.66–7.59 (m, 4H), 7.56 (d, *J* = 7.3 Hz, 2H), 7.45 (d, *J* = 7.3 Hz, 2H), 7.15 (dt, *J* = 7.4, 1.1 Hz, 2H), 6.96 (dt, *J* = 7.4, 0.6 Hz, 2H), 6.89 (dt, *J* = 7.6, 1.2 Hz, 4H), 6.49 (dt, *J* = 7.6, 1.2 Hz, 2H), 6.26 (d, *J* = 7.8 Hz, 2H), 5.83 (s, 2H), 5.21 (d, *J* = 7.8 Hz, 2H); <sup>13</sup>C NMR (126 MHz, DMSO-*d*<sub>6</sub>)  $\delta$  145.9, 143.6, 143.2, 142.8, 141.2, 140.7, 128.1, 127.7, 127.4, 127.2, 126.9, 126.2, 125.7, 123.9, 122.9, 120.4, 119.6, 119.1, 52.2; EI-MS *m/z* 506 (M<sup>+</sup>); analysis (calcd., found for C<sub>40</sub>H<sub>26</sub>): C (94.83, 94.71), H(5.17, 5.44).

**Tris(9-fluorenylidene)methane (**1**):** In an argon-filled Schleck tube, *n*-butyllithium (1.8 M in hexane, 0.1 ml, 0.18 mmol) was added to a solution of compound **2** (32 mg, 0.063 mmol) in degassed THF (4.0 ml) at room temperature. The reaction mixture was stirred for 30 min to afford a deep-purple solution. A solution of *p*-chloranil (23.6 mg, 0.096 mmol) in degassed THF

(2 ml) was added slowly to the reaction mixture. The reaction mixture was allowed to stand for two days at room temperature. The resulting deep purple crystals were collected by filtration and washed with DCM and ethanol to give **1** (8 mg, 0.016 mmol, 27%). CP/MAS  $^{13}\text{C}$  NMR (100 MHz, powder, 100 K)  $\delta$  143.6, 141.1, 132.4, 130.5, 128.1, 124.9, 122.2, 119.8, 82.9; (200 K)  $\delta$  141.1, 140.1, 137.0, 132.0, 130.1, 128.2, 124.7, 122.5, 119.7, 80.1; (300 K)  $\delta$  141.2, 140.3, 137.5, 131.9, 129.9, 128.6, 124.8, 122.8, 121.3, 120.0, 79.5.

**Isolation of tris(9-fluorenylidene)methane dianion (**3**) in crystalline form:** In a argon-filled Schlenk tube, *n*-butyllithium (1.8 M in hexane, 0.2 ml, 0.36 mmol) was added to a solution of compound **2** (53 mg, 0.105 mmol) in THF (4.0 mL) at room temperature. The reaction mixture was stirred for 30 min to afford a deep-purple solution. *n*-Hexane (4.0 ml) was slowly added to the reaction mixture and allowed to stand for 2 days. A trace amount of deep purple crystals was collected under argon atmosphere.  $^1\text{H}$  NMR (400 MHz, THF- $d_8$ )  $\delta$  8.01 (d,  $J$  = 7.4 Hz, 6H), 6.95 (d,  $J$  = 7.4 Hz, 6H), 6.66 (dt,  $J$  = 7.4, 1.1 Hz, 6H), 6.56 (dt,  $J$  = 7.4, 1.1 Hz, 6H);  $^{13}\text{C}$  NMR (100 MHz, THF- $d_8$ )  $\delta$  143.9, 141.0, 130.1, 121.54, 121.1, 117.4, 113.1, 108.8.

## Methods

**Computational details:** All quantum chemical calculations were performed with the Gaussian 16 program, revision B.01 <sup>S1</sup>. Version 3.8 of the multiwfn software <sup>S2</sup> was used for topological analysis of the electron density that is obtained by DFT calculations.

**Polarized reflectivity spectra and their analyses:** Steady-state reflectivity ( $R$ ) spectra for 1.5–5.7 eV were measured by using a microscopic spectrometer (MSV 5200TSO, JASCO) equipped with a specially designed cryostat. Fig. S10A shows the  $R$  spectra of **1** at 100 K obtained with light polarized along (red solid line) and perpendicular (black solid line) to the  $a$ -axis on the single crystal (001) face. We obtained the optical conductivity ( $\sigma$ ) spectra from the  $R$  spectra using the Kramers-Kronig transformation, which are shown in Fig. 2A in the main paper. In Fig. S10B and S10C, we show respectively the polarized  $R$  and  $\sigma$  spectra along the  $a$ -axis at 100 K, 200 K and 300 K. The temperature dependence of the peak wavelength corresponding to the HOMO to LUMO transition of **1** is plotted in nm in Fig. S10D, which is also shown in Fig. 4d. The peak wavelength of each  $\sigma$  spectrum shown in Fig. S10D is obtained from the fitting analyses, in which a Gaussian spectral shape is assumed to reproduce each peak or shoulder structure of the  $\sigma$  spectra below 2.5 eV. Error bars are determined, taking into account the standard deviations of the least-squares fit.

**X-ray electron density distribution analysis of **1**:** A purple block shaped single crystal of **1**,  $0.14 \times 0.10 \times 0.05 \text{ mm}^3$ , was selected for measurements. The diffraction data were collected using a RIGAKU AFC-8 diffractometer equipped with a Saturn70 CCD detector with MoK $\alpha$  radiation by an oscillation method about the  $\omega$ -axis at 90 K. X-rays were monochromated and focused by a confocal mirror. Bragg spots were integrated, scaled and averaged up to  $\sin\theta/\lambda = 1.11 \text{ \AA}^{-1}$  by the program HKL2000 <sup>S3</sup>. Lorentz and polarization, but no absorption corrections were applied. The number of measured and independent reflections, completeness, and  $R_{\text{int}}$  were 151624, 28858, 0.993 and 0.0332, respectively, up to  $\sin\theta/\lambda = 1.11 \text{ \AA}^{-1}$ .

The initial structure of **1** was solved by a dual-space method using the program SHELXT-2018/2 <sup>S4</sup> and refined by a full matrix least-squares method using the program SHELXL-2018/3 <sup>S4</sup>. Positions of all hydrogen atoms were located on difference Fourier maps and refined by applying riding models.

High order refinements were carried out using 24397 independent reflections with  $\sin\theta/\lambda \geq 0.60 \text{ \AA}^{-1}$ , which is enough to avoid the contribution of valence electrons on the diffraction data (Fig. S1). The C–H distance was constrained at 1.083 Å during the refinements.

The multipole refinements using the Hansen-Coppens multipole formalism<sup>S5</sup> and topological analysis based on the resulted parameters were performed with the XD2006 package<sup>S6</sup>. The refinements were carried out against 19007 independent reflections with  $\sin\theta/\lambda \leq 1.11 \text{ \AA}^{-1}$  with  $I > 3\sigma(I)$  based on  $F^2$ . At the first stage of the refinements, the atomic coordinates and temperature factors of the atoms were fixed on those from the high order refinement. The population parameters,  $P_v$ ,  $P_{lm\pm}$  of the non-hydrogen atoms and scale were refined. The multipole level of population parameters was raised up to hexadecapole for the carbon atoms of central and fluorenyl 9H-position and octupole for the other carbon atoms, and dipole along the C–H bonds for hydrogen atoms. Chemical equivalent constraints were imposed for multipole parameters of all atoms. The radial screening parameters,  $\kappa$  and  $\kappa'$  were refined after refinements of multipole parameters at the highest level of each atom. The refinement cycles were repeated until parameters converged. At the second stage, the temperature factors were refined by applying harmonic anisotropic models for the non-hydrogen atoms, and isotropic models for hydrogen atoms, following the refinements of the radial screening parameters,  $\kappa$  and  $\kappa'$ . The chemical equivalent constraints on the multipole parameters were relaxed in a stepwise manner until releasing all the constraints on the C-atoms. The stage was repeated until the shifts of the parameters converged. At the final stage, the coordinates, temperature factors, and multipoles were refined. The C–H distances were constrained at 1.083. The number of parameters at the final cycle of the refinements was 1116. Total molecular charge was constrained to be neutral.

**Solid-state NMR spectroscopy of 1:** One-dimensional  $^{13}\text{C}$  CP-MAS NMR experiments were performed using JEOL ECA400 spectrometer. The typical  $^1\text{H}$  pulse width was 2.75  $\mu\text{s}$ , and the contact time for CP was 7 ms. The relaxation delay was 5 s, and the spectral width was 40.2 kHz. For  $^1\text{H}$  decoupling, the TPPM pulse sequence was used and the strength was 90.9 kHz. Spectra were recorded at 100 K, 200 K, and 300K under 10 kHz MAS.

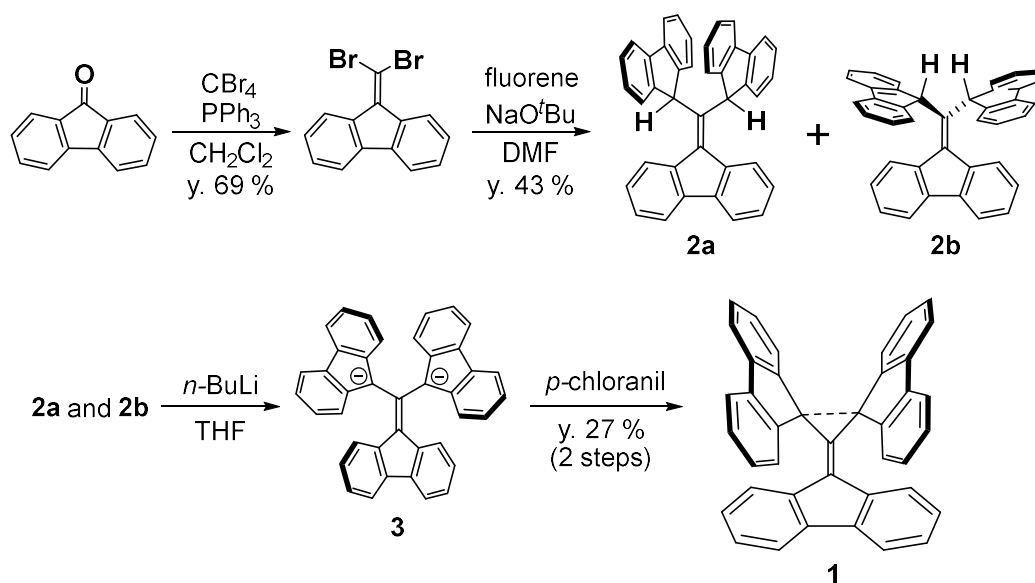

**Scheme S1.**

Synthetic route to **1**. The structure of **2a** was confirmed by  $^1\text{H}/^{13}\text{C}$  NMR and X-ray structural analyses. As for **2b**, a proposed structure is shown, which is based on  $^1\text{H}$  and  $^{13}\text{C}$  NMR analyses.

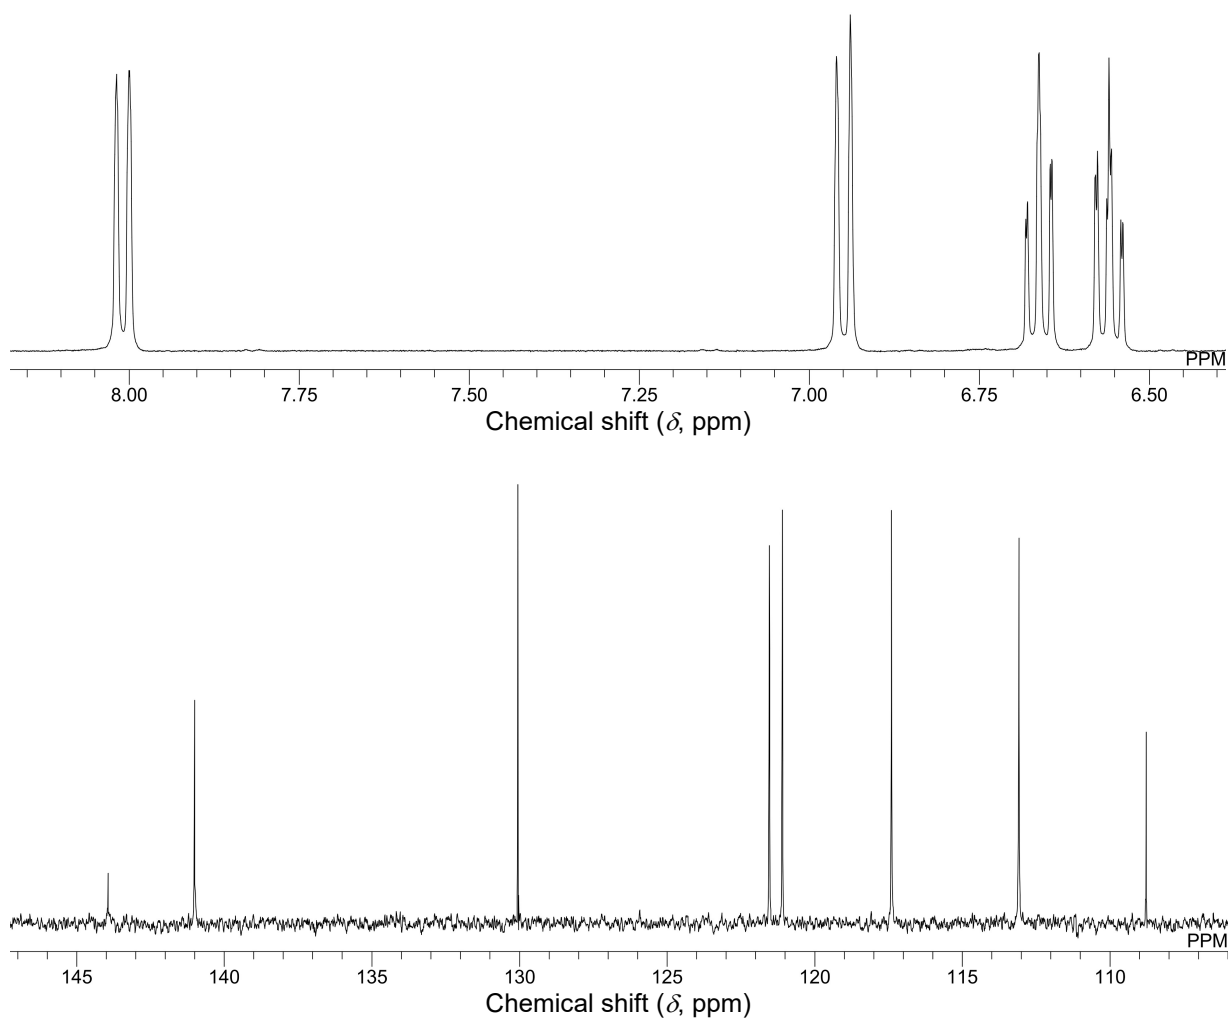

**Fig. S1.**

(Top) <sup>1</sup>H NMR and (bottom) <sup>13</sup>C NMR spectra of dianion species (**3**) in THF-*d*<sub>8</sub> measured at room temperature.

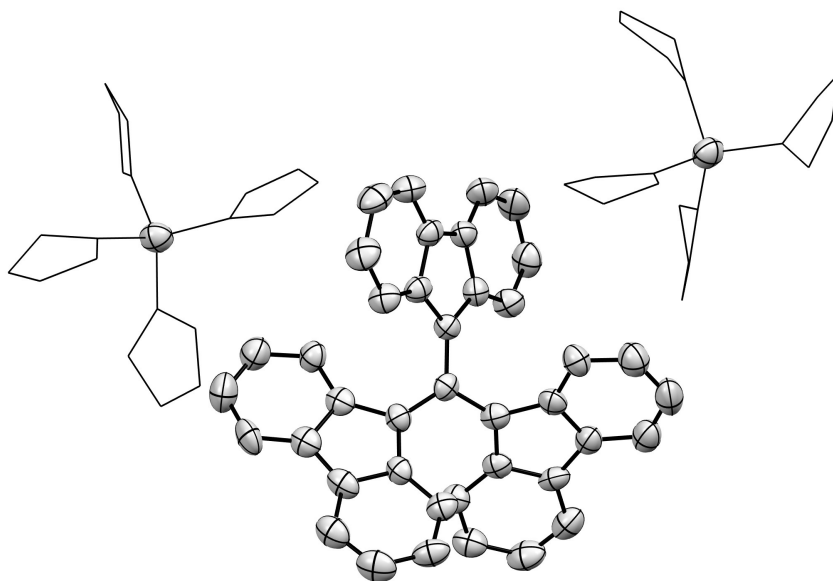

**Fig. S2.**

ORTEP drawing of **3**•[Li(THF)<sub>4</sub>]<sub>2</sub>. Thermal ellipsoids are drawn at the 50% probability level. Hydrogen atoms are omitted for clarity. THF molecules coordinated to a lithium cation atom are drawn with a wireframe model.

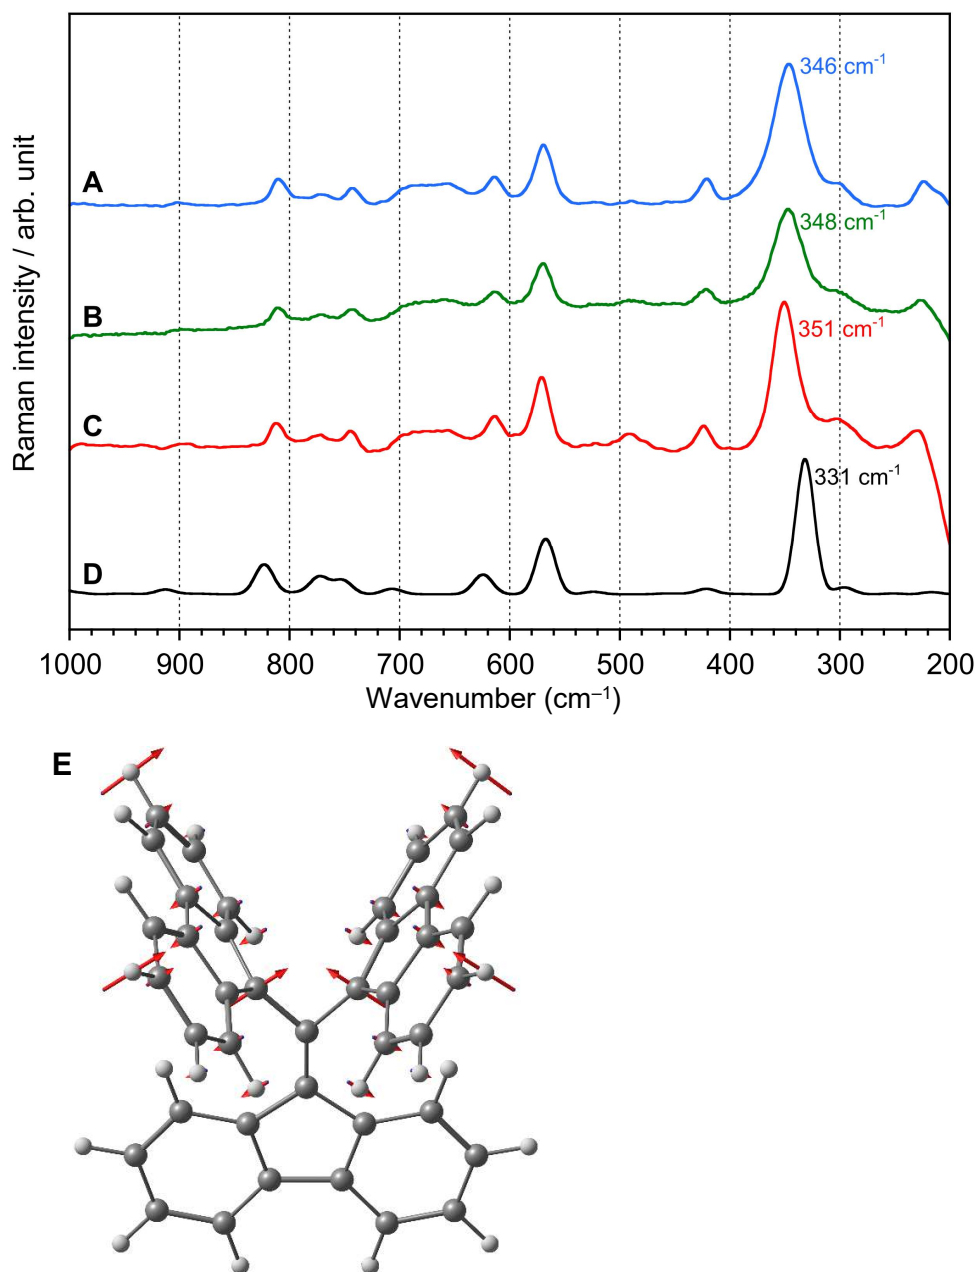

**Fig. S3.**

Experimental and theoretical Raman vibrational spectra of **1**. (A) Measured with a single crystal at 300 K, (B) 200 K, and (C) 100 K. (D) Simulated by the B3LYP-D3/6-311+G\*\* calculation with the geometry optimized by the B3LYP-D3/6-311+G\*\* calculation. All calculated states were broadened with a Gaussian of 20  $\text{cm}^{-1}$  full width at half maximum. According to the B3LYP-D3 calculation, the peak of 331  $\text{cm}^{-1}$  corresponds to the C2–C3 stretching vibration. However, the contribution weight of the Raman active C2–C3 stretching vibration to the peak of 331  $\text{cm}^{-1}$  is only 8.0%: a scissoring motion of the bisfluorenylmethyldiene moiety dominates the peak (see Fig. E).



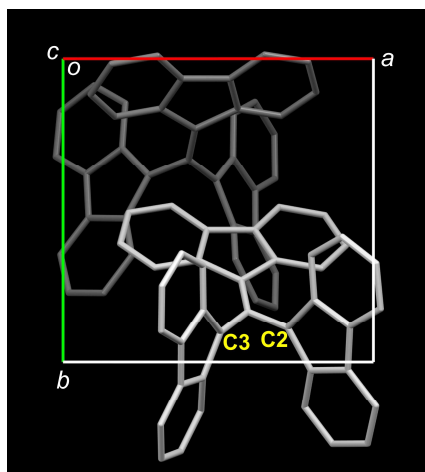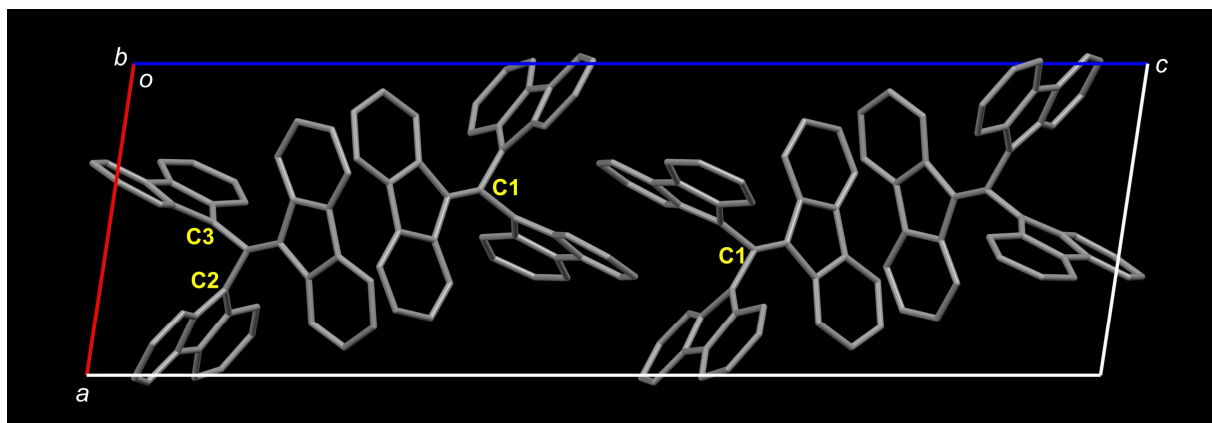

**Fig. S4.**

Crystal packing diagram of **1** along (top) *c*-axis and (bottom) *b*-axis. Hydrogen atoms are omitted for clarity.

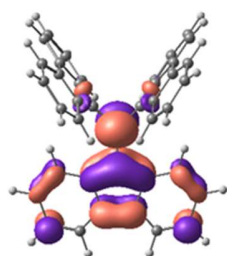

MO134

Excited State 1: 480.24 nm  $f=0.0001$   
 131  $\rightarrow$  133 0.70459  
 $x, y, z = -0.0003, -0.0000, 0.0436$

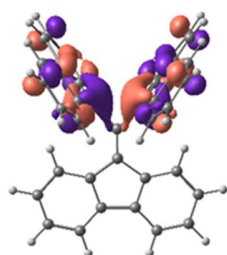

MO133  
(LUMO)

Excited State 2: 465.99 nm  $f=0.0000$   
 132  $\rightarrow$  134 0.70387  
 $x, y, z = 0.0101, -0.0000, -0.0205$

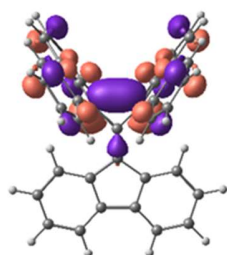

MO132  
(HOMO)

Excited State 3: 461.63 nm  $f=0.4150$   
**132  $\rightarrow$  133 0.70831**  
 132  $\leftarrow$  133 -0.10861  
 $x, y, z = 0.0000, \mathbf{2.5114}, 0.0000$

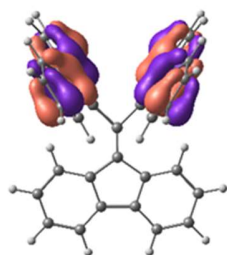

MO131

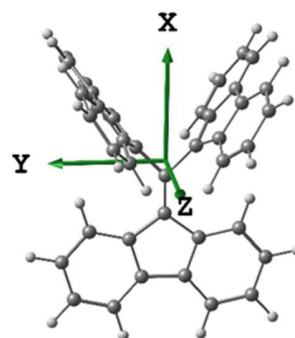

**Fig. S5.**

TD-B3LYP-D3/6-311+G\*\* calculation results of **1**. The structure used for the TD calculation was optimized at the B3LYP-D3/6-311+G\*\* level of theory and converged to the  $C_s$  symmetry. The peak of 518 nm observed at 100 K corresponds to  $S_0 \rightarrow S_3$  transition.

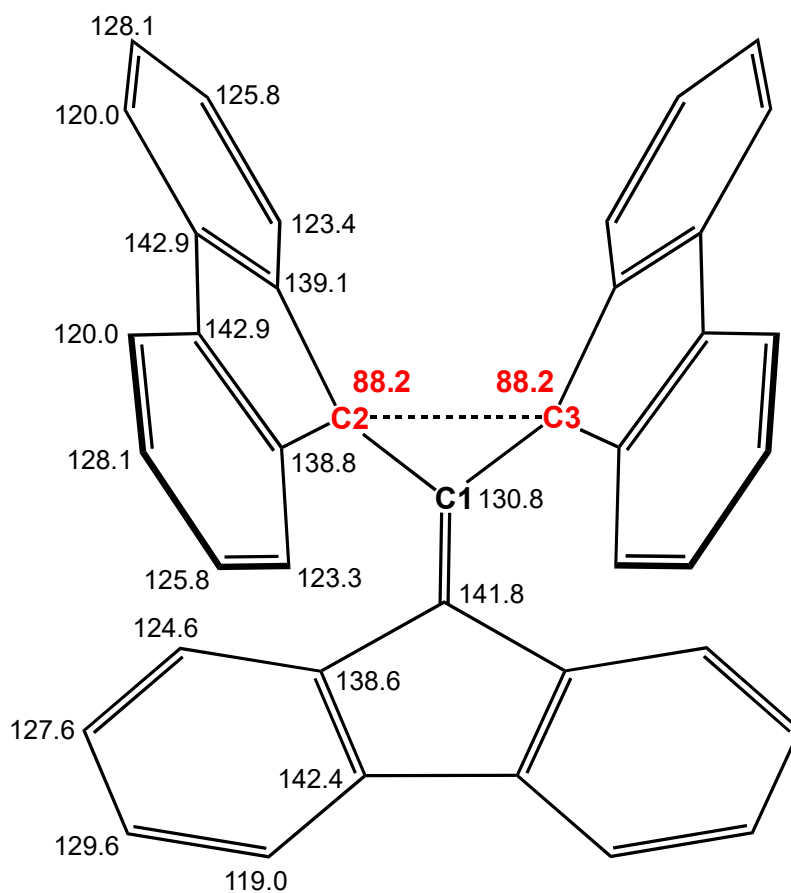

**Fig. S6.**

Theoretically predicted  $^{13}\text{C}$  chemical shifts ( $\delta_{\text{pred}}$ ) of **1**, which was estimated by the empirically scaled GIAO-B3LYP-D3/6-311+G\*\* method. The structure was optimized at the B3LYP-D3/6-311+G\*\* level of theory and converged to the  $C_s$  symmetry. The following equation was applied to the GIAO-calculated chemical shifts ( $\delta_{\text{GIAO}}$ );  $\delta_{\text{pred}} = (181.3782 - \delta_{\text{GIAO}}) / 1.0228$  <sup>S7</sup>.

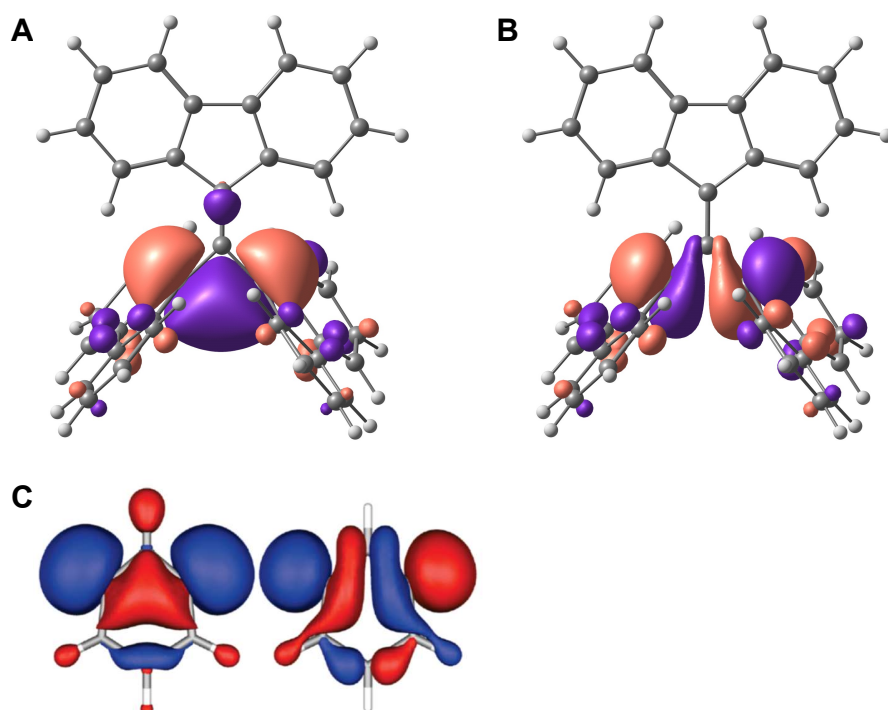

**Fig. S7.**

(A) HONO and (B) LUNO of **1** plotted with an isodensity value of  $0.03 \text{ e au}^{-3}$ . (C) TCSCF orbitals  $\psi_S'$  and  $\psi_A'$  of *m*-benzyne. Reprinted with permission from Wei, H.; Hrovat, D. A.; Mo, Y.; Hoffmann, R.; Borden, W. T. *J. Phys. Chem. A* **113**, 10351–10358 (2009). Copyright 2009 American Chemical Society.

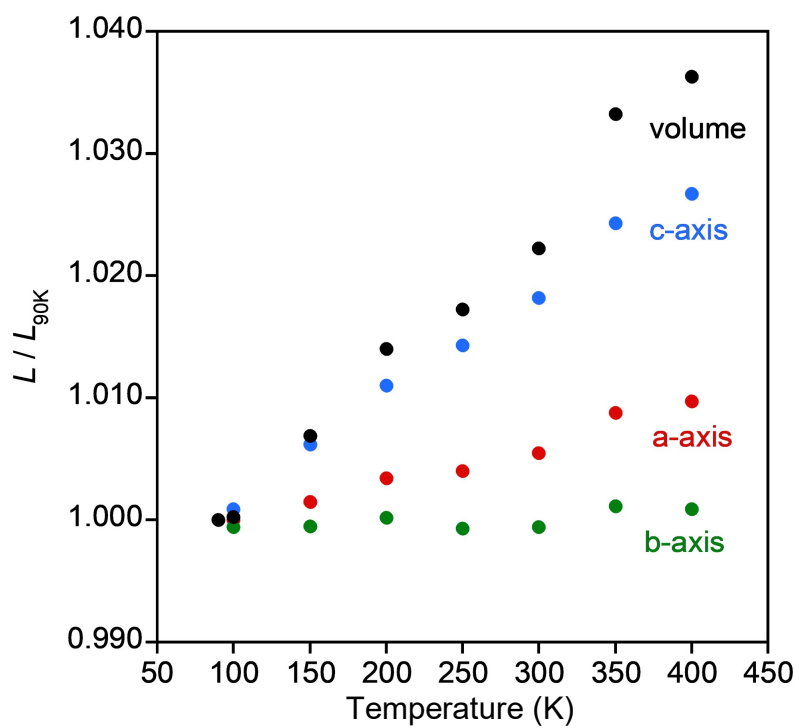

**Fig. S8.**

Temperature dependence of the lattice parameters ( $L$ ) for **1**.

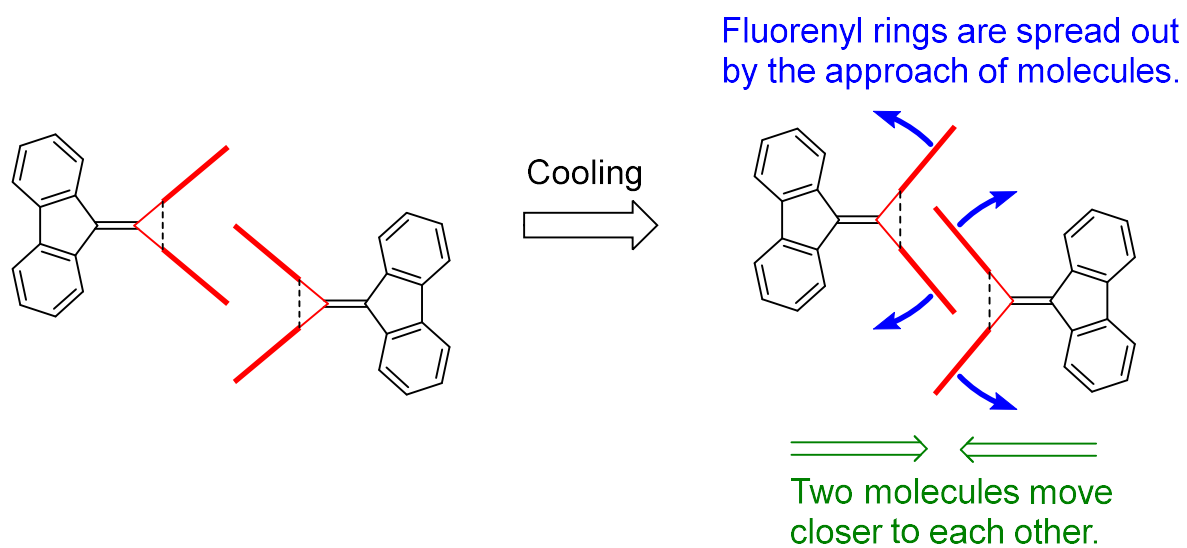

**Fig. S9.**

Schematic drawing for the effect of the interlocked dimeric structure of **1** on the interatomic distance between C2 and C3.

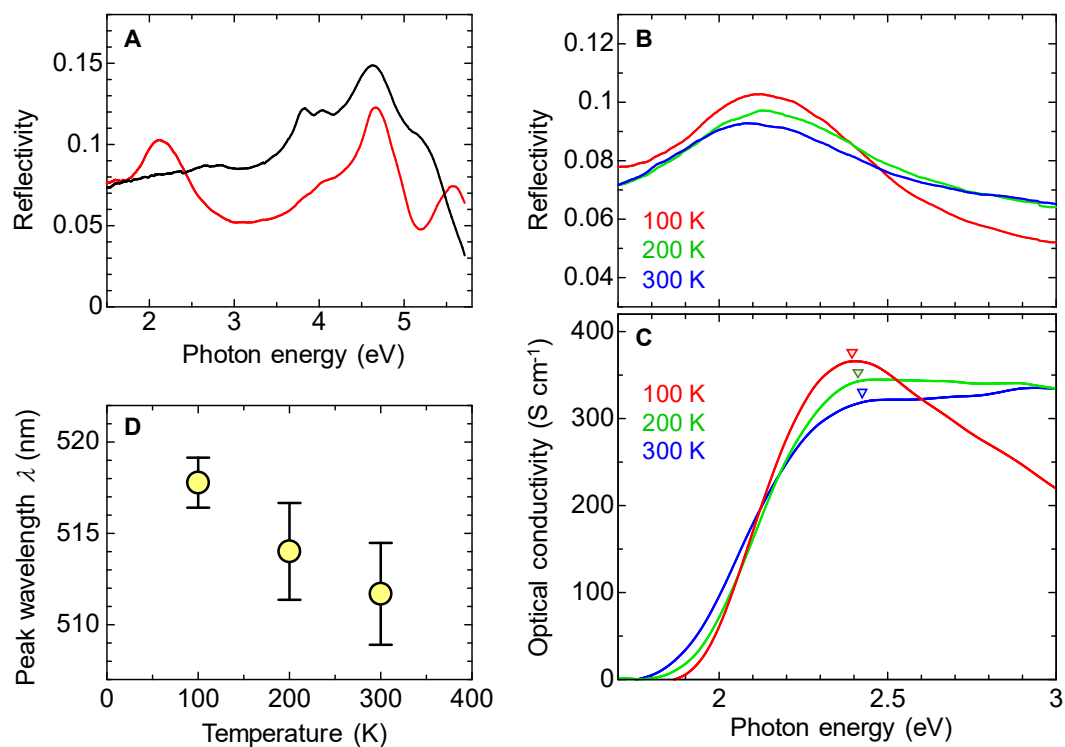

**Fig. S10.**

(A) Optical reflectivity ( $R$ ) spectra of **1** at 100 K obtained with light polarized along (red solid line) and perpendicular (black solid line) to the  $a$ -axis on the single crystal (001) face. (B) The  $R$  spectra and (C) the  $\sigma$  spectra of **1** along the  $a$ -axis at 100 K, 200 K, and 300 K in the visible region. (D) The temperature dependence of the transition peak wavelength of the  $\sigma$  spectra shown by the triangles in Fig. C.

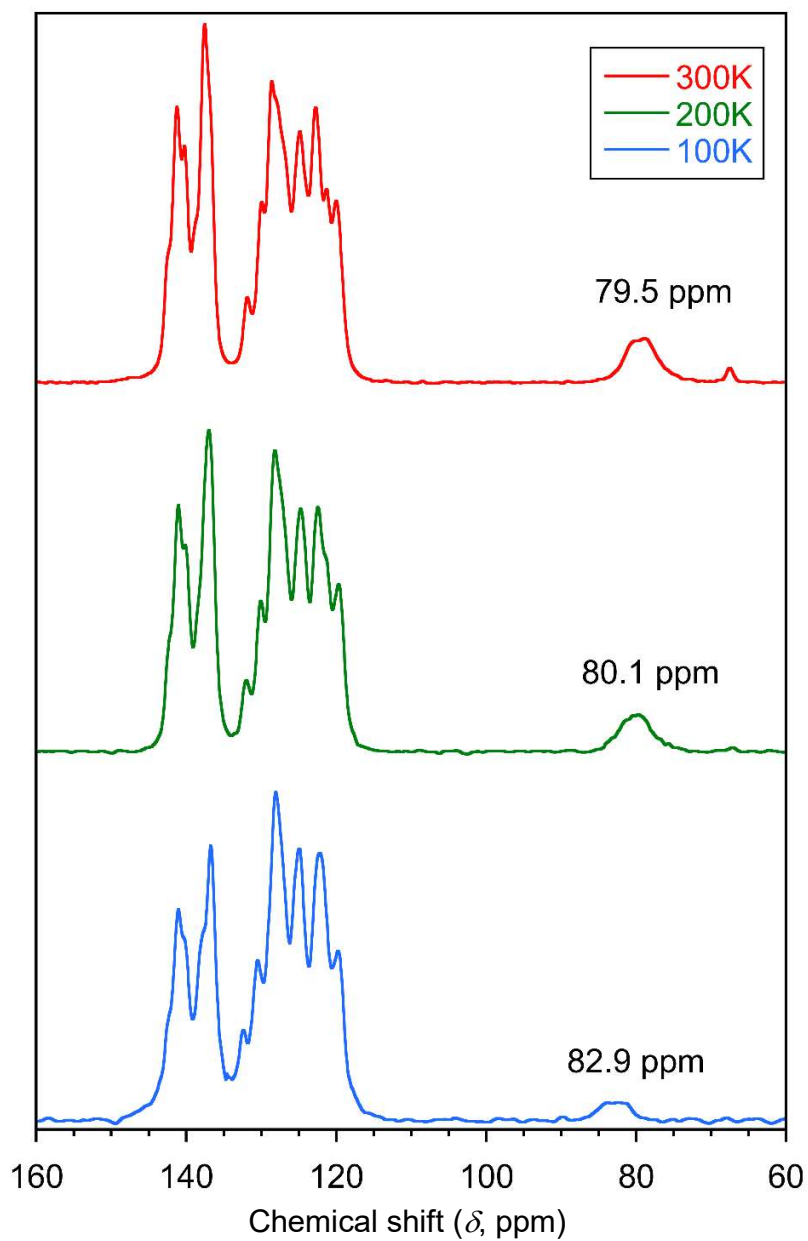

**Fig. S11.**

Solid state CP/MAS  $^{13}\text{C}$  NMR spectra of powdered **1** measured at 100, 200, and 300 K. Chemical shifts are referenced to the methyl carbon ( $\delta$  17.17) of hexamethylbenzene as a standard.



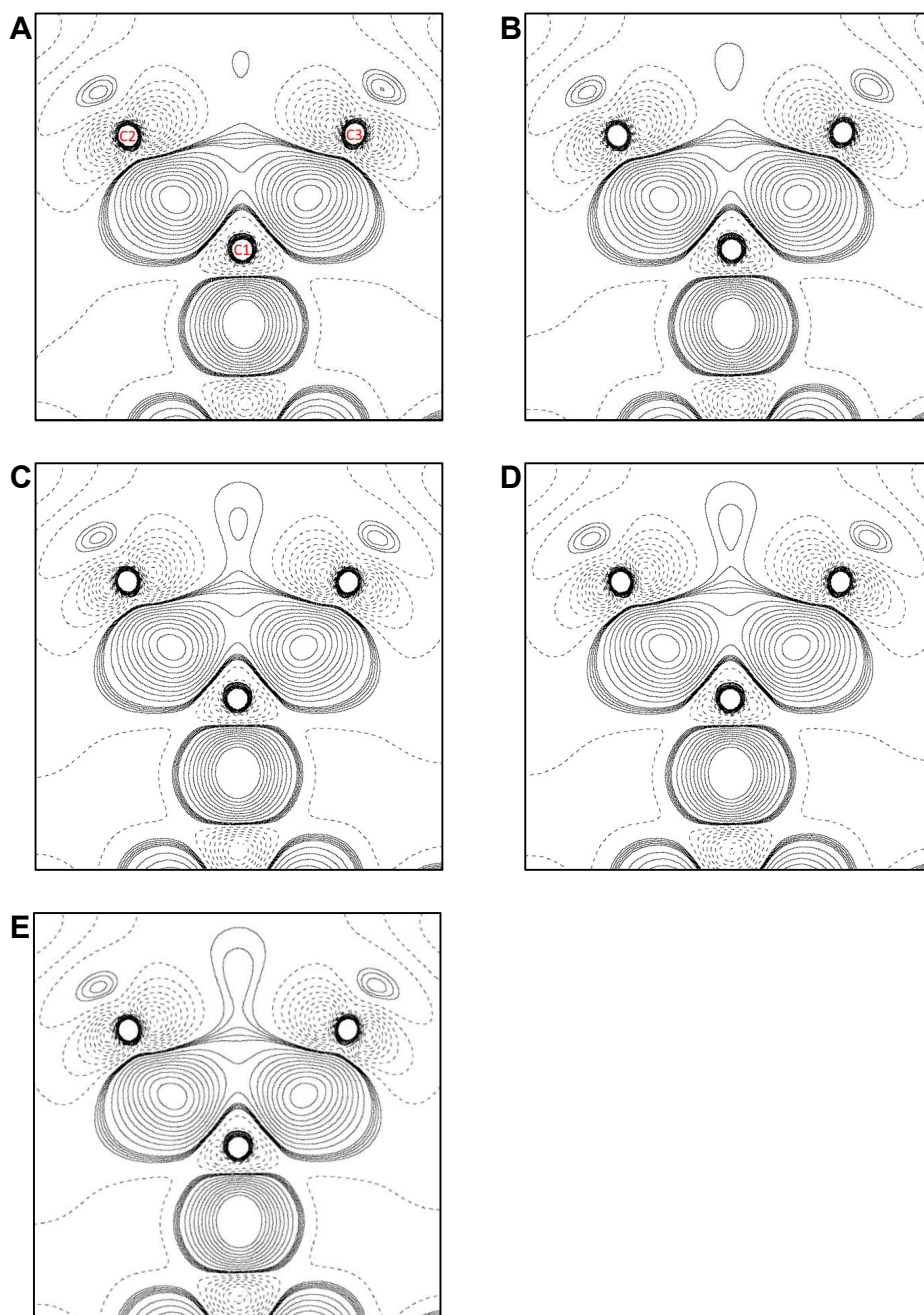

**Fig. S12.**

Static model deformation density maps on the C1-C2-C3 plane of **1**, obtained by the B3LYP-D3/6-311+G\*\* calculation. The molecular structures used for the calculation are based on the X-ray crystallographic measurements at (A) 90 K, (B) 100K, (C) 200 K, (D) 300 K, and (E) 400K. The solid lines represent positive contours from 0.01 to 0.05 e Å<sup>-3</sup> in steps of 0.01 e Å<sup>-3</sup> and from 0.10 to 0.50 e Å<sup>-3</sup> in steps of 0.05 e Å<sup>-3</sup>. The dashed lines represent negative contours from -0.05 to -0.50 in steps of -0.05 e Å<sup>-3</sup>.

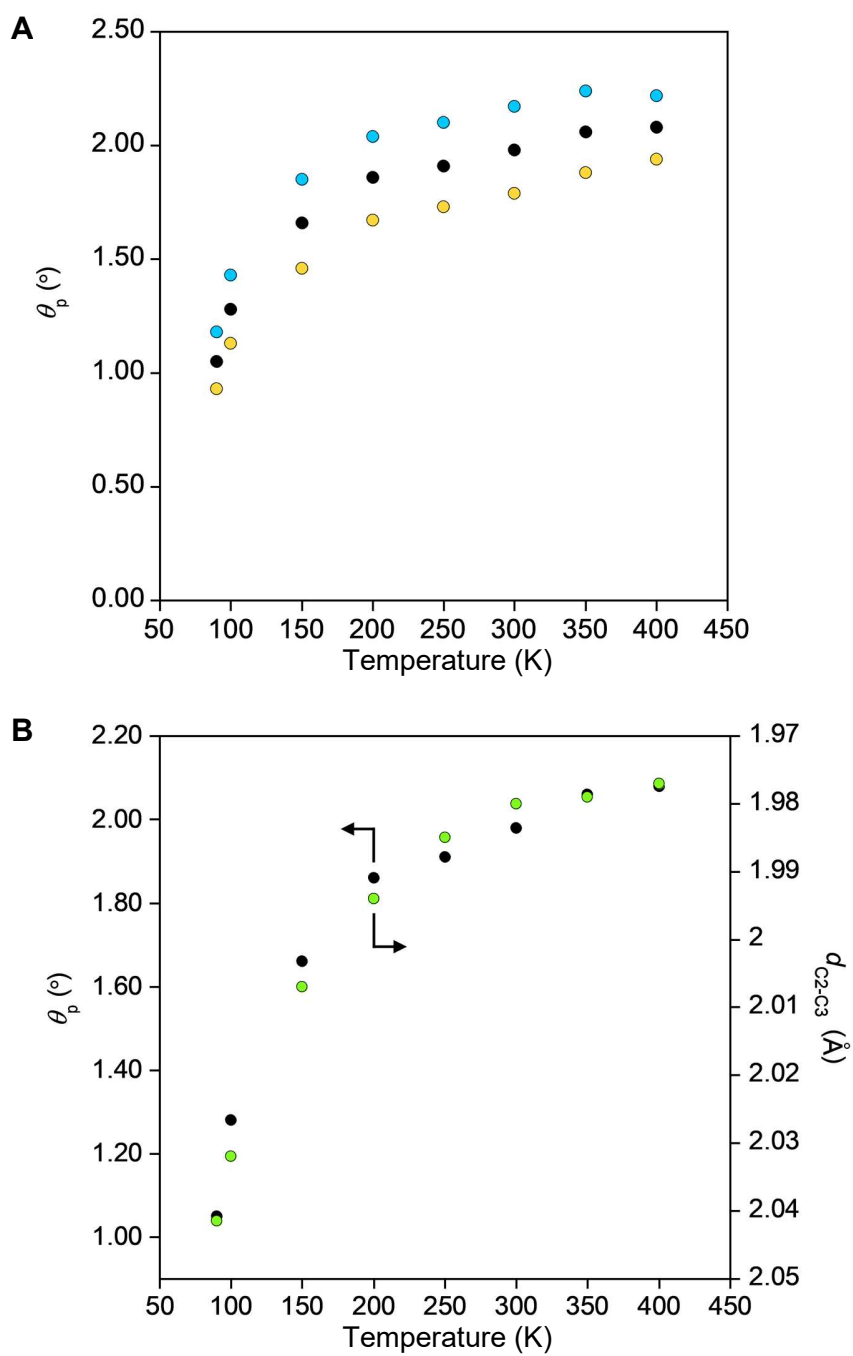

**Fig. S13.**

(A) Temperature dependence of the pyramidalization angle ( $\theta_p$ , °) of C2 and C3 determined by the POAV analysis. (B) Comparison of the temperature dependence of  $\theta_p$  with that of  $d_{C2-C3}$ .

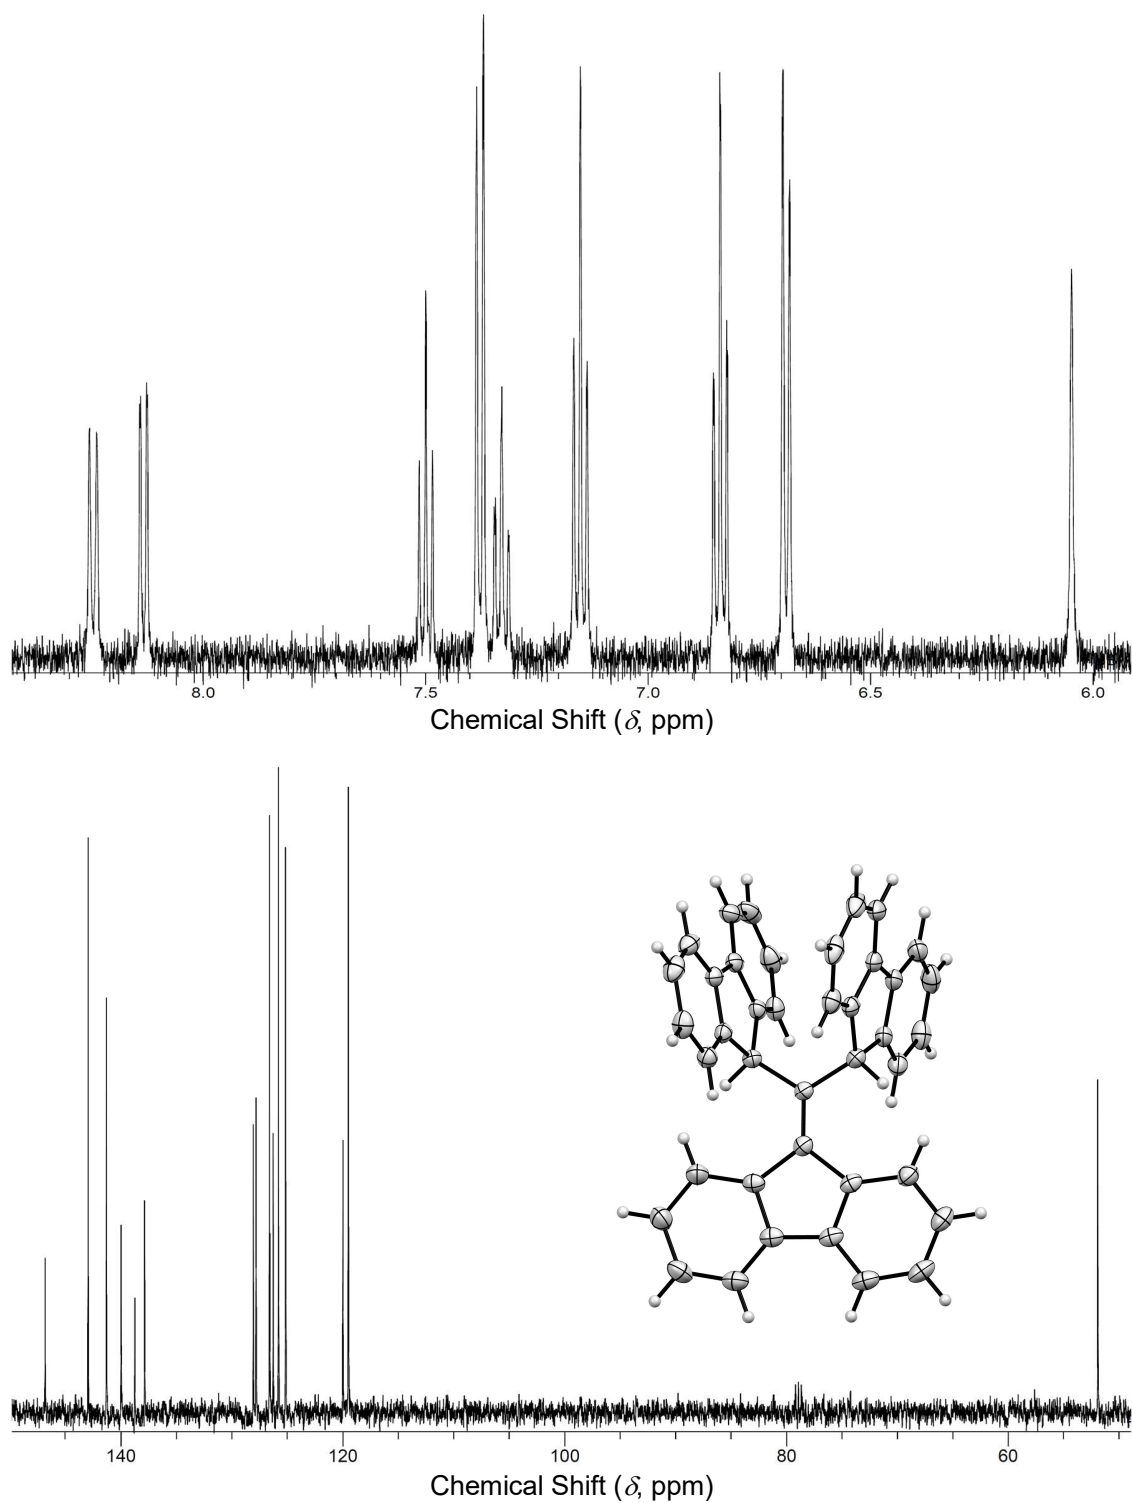

**Fig. S14.**

(Top)  $^1\text{H}$  and (bottom)  $^{13}\text{C}$  NMR spectra of **2a** in  $\text{DMSO}-d_6$ . The structure of **2a** was confirmed by X-ray crystallographic analysis, as shown as the ORTEP drawing.

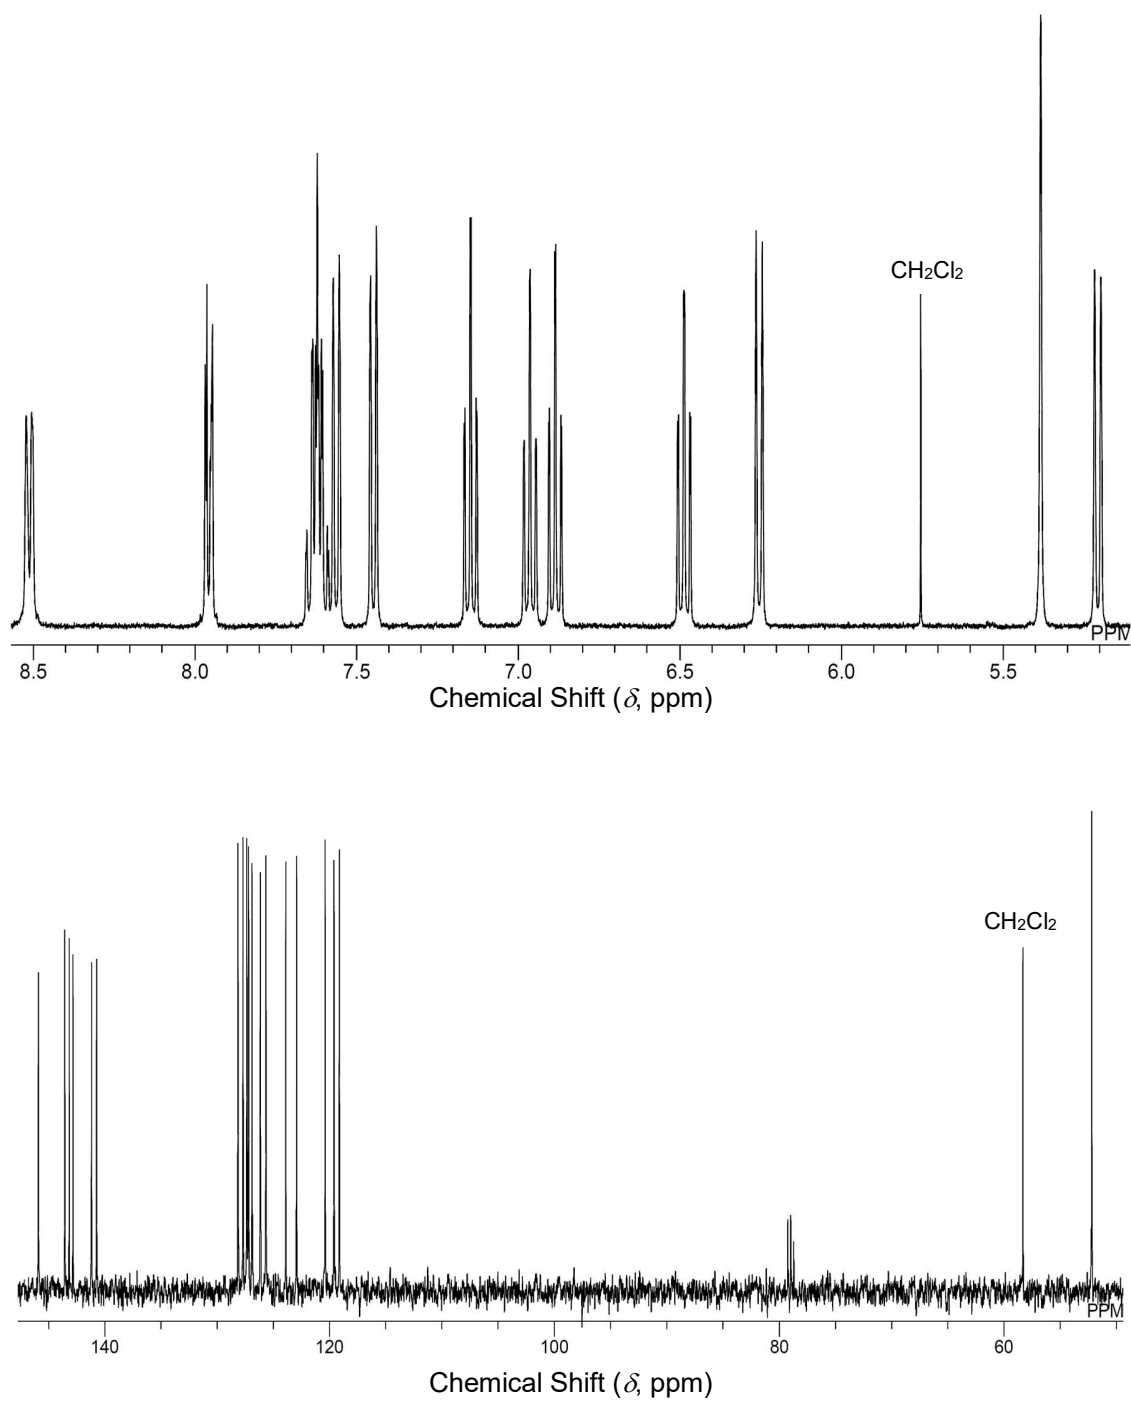

**Fig. S15.**  
(Top) <sup>1</sup>H and (bottom) <sup>13</sup>C NMR spectra of **2b** in DMSO-*d*<sub>6</sub>.

**Table S1.**Equilibrium structures of **1** calculated at different DFT levels of theory<sup>a</sup>.

| DFT method    | Basis set | Interatomic distance <sup>b</sup><br>( $d_{C2-C3}$ ) / Å | Bond angle <sup>b</sup><br>( $\theta_{C2-C1-C3}$ ) / ° | Sum of electronic and zero-point energies / hartree |
|---------------|-----------|----------------------------------------------------------|--------------------------------------------------------|-----------------------------------------------------|
| B3LYP         | 6-31G*    | 1.791                                                    | 75.89                                                  | −1538.195923                                        |
| B3LYP         | 6-31G**   | 1.794                                                    | 76.01                                                  | −1538.234577                                        |
| B3LYP         | 6-311G**  | 1.810                                                    | 76.90                                                  | −1538.539168                                        |
| B3LYP-D3      | 6-31G*    | 1.801                                                    | 76.69                                                  | −1538.270365                                        |
| B3LYP-D3      | 6-31G**   | 1.804                                                    | 76.86                                                  | −1538.309033                                        |
| B3LYP-D3      | 6-31+G**  | 1.802                                                    | 76.70                                                  | −1538.356385                                        |
| B3LYP-D3      | 6-311G*   | 2.047                                                    | 89.25                                                  | −1538.571220                                        |
| B3LYP-D3      | 6-311G**  | 2.048                                                    | 89.33                                                  | −1538.614029                                        |
| B3LYP-D3      | 6-311+G** | 2.048                                                    | 89.32                                                  | −1538.628896                                        |
| B3LYP-D3      | cc-pVDZ   | 2.071                                                    | 90.20                                                  | −1538.361481                                        |
| B3LYP-D3      | cc-pVTZ   | 2.043                                                    | 89.27                                                  | −1538.769782                                        |
| B3LYP-D3(BJ)  | 6-31G*    | 2.108                                                    | 92.42                                                  | −1538.377889                                        |
| B3LYP-D3(BJ)  | cc-pVTZ   | 2.100                                                    | 92.26                                                  | −1538.877506                                        |
| B3PW91-D3     | 6-311G*   | 1.726                                                    | 73.17                                                  | −1537.974350                                        |
| B3PW91-D3(BJ) | 6-311G*   | 1.718                                                    | 72.91                                                  | −1538.078416                                        |
| B3PW91-D3     | cc-pVTZ   | 1.725                                                    | 73.30                                                  | −1538.169009                                        |
| M06-2X        | 6-311G*   | 1.656                                                    | 69.41                                                  | −1537.889563                                        |
| M06-2X        | cc-pVTZ   | 1.653                                                    | 69.44                                                  | −1538.088938                                        |
| wB97XD        | 6-311G*   | 1.668                                                    | 70.08                                                  | −1537.965158                                        |
| wB97XD        | cc-pVTZ   | 1.666                                                    | 70.18                                                  | −1538.150041                                        |
| PBE0-D3       | 6-311G*   | 1.696                                                    | 71.67                                                  | −1536.719217                                        |
| PBE0-D3(BJ)   | 6-311G*   | 1.692                                                    | 71.53                                                  | −1536.769500                                        |

<sup>a</sup> Frequency calculation was performed for each optimized structure to ensure that a minimum on the potential energy surface was located.<sup>b</sup> The interatomic distances and bond angles are diverse and strongly depend on the level of theory applied. Similar findings have been reported for *m*-benzyne<sup>S8</sup>.

## Summary of DFT calculations.

**Cartesian coordinates used for DFT calculations (NBO analysis, singlet–triplet energy gap, electron density analysis, and CASSCF calculations).**

**1 at 90 K**

|   |              |              |              |
|---|--------------|--------------|--------------|
| 6 | 0.000000000  | 0.000000000  | 0.000000000  |
| 6 | 1.316060507  | 0.267307895  | 0.027824991  |
| 6 | 2.168627929  | 0.348282272  | 1.230398458  |
| 6 | 1.867761193  | 0.149927037  | 2.576661213  |
| 6 | 2.908302949  | 0.212815708  | 3.509507861  |
| 6 | 4.220787584  | 0.489261749  | 3.105108712  |
| 6 | 4.524966042  | 0.692855302  | 1.756090502  |
| 6 | 3.494596670  | 0.610550520  | 0.822510896  |
| 6 | 3.516417689  | 0.711344313  | -0.642853719 |
| 6 | 4.562158897  | 0.967681658  | -1.524747983 |
| 6 | 4.284792680  | 1.005925325  | -2.895929373 |
| 6 | 2.987504097  | 0.783695982  | -3.374386741 |
| 6 | 1.933461434  | 0.536123349  | -2.491977054 |
| 6 | 2.206943542  | 0.499429020  | -1.124333072 |
| 6 | -1.035576413 | 0.000000000  | -1.018177536 |
| 6 | -1.586195649 | 1.187238770  | -1.688979712 |
| 6 | -1.180950468 | 2.521791452  | -1.682857352 |
| 6 | -1.871370339 | 3.435824663  | -2.489433256 |
| 6 | -2.957943527 | 3.032053335  | -3.271703939 |
| 6 | -3.339801559 | 1.687743341  | -3.311454207 |
| 6 | -2.638085842 | 0.770865337  | -2.544252291 |
| 6 | -2.711583460 | -0.688710551 | -2.511998192 |
| 6 | -3.501423102 | -1.568774199 | -3.242107305 |
| 6 | -3.253534018 | -2.941929607 | -3.123464035 |
| 6 | -2.202907964 | -3.411662160 | -2.328395973 |
| 6 | -1.403087037 | -2.522911869 | -1.593003286 |
| 6 | -1.691441280 | -1.159319266 | -1.642003727 |
| 6 | -1.035576413 | 0.000000000  | 1.022865335  |
| 6 | -1.750938336 | -1.118504871 | 1.649200048  |
| 6 | -1.614810336 | -2.503925951 | 1.526731283  |
| 6 | -2.475596160 | -3.335838691 | 2.255646888  |
| 6 | -3.427879657 | -2.794584319 | 3.130117496  |
| 6 | -3.519041714 | -1.412009772 | 3.319001329  |
| 6 | -2.682316402 | -0.586790867 | 2.582193679  |
| 6 | -2.521150930 | 0.865877906  | 2.626206474  |
| 6 | -3.148612475 | 1.831561978  | 3.408502634  |
| 6 | -2.720483875 | 3.161478287  | 3.305204460  |
| 6 | -1.669223234 | 3.503476274  | 2.450527655  |
| 6 | -1.045057497 | 2.537905000  | 1.648153524  |
| 6 | -1.495024545 | 1.217828575  | 1.711611280  |
| 1 | 0.852084935  | -0.049978498 | 2.893920596  |
| 1 | 2.696963466  | 0.046592516  | 4.558109060  |

|   |              |              |              |
|---|--------------|--------------|--------------|
| 1 | 5.008503059  | 0.543403286  | 3.845569396  |
| 1 | 5.538024352  | 0.911698981  | 1.445194534  |
| 1 | 5.568206599  | 1.136379395  | -1.159856088 |
| 1 | 5.086024988  | 1.210453274  | -3.596778934 |
| 1 | 2.800891177  | 0.804526877  | -4.440959144 |
| 1 | 0.927838767  | 0.376974482  | -2.861068762 |
| 1 | -0.350059235 | 2.844244975  | -1.067062349 |
| 1 | -1.558029067 | 4.472331307  | -2.507851292 |
| 1 | -3.506602838 | 3.764952945  | -3.850500209 |
| 1 | -4.170329739 | 1.370006476  | -3.929822404 |
| 1 | -4.291138580 | -1.202370936 | -3.886640557 |
| 1 | -3.880786411 | -3.647668838 | -3.654110409 |
| 1 | -2.005500116 | -4.475872478 | -2.279370055 |
| 1 | -0.576843097 | -2.890713368 | -0.997954540 |
| 1 | -0.856126534 | -2.927698371 | 0.879540565  |
| 1 | -2.406937846 | -4.411372911 | 2.142557642  |
| 1 | -4.098730559 | -3.456257166 | 3.666245382  |
| 1 | -4.228185981 | -0.996868577 | 4.024203567  |
| 1 | -3.951370085 | 1.561301845  | 4.083085230  |
| 1 | -3.209323678 | 3.929228506  | 3.892700204  |
| 1 | -1.331276693 | 4.530968827  | 2.409342827  |
| 1 | -0.228746980 | 2.812441076  | 0.991093342  |

# 1 at 100K

|   |              |              |              |
|---|--------------|--------------|--------------|
| 6 | 2.175000000  | 3.022000000  | 10.771000000 |
| 6 | 2.514000000  | 2.101000000  | 9.865000000  |
| 6 | 1.623000000  | 1.496000000  | 8.849000000  |
| 6 | 0.285000000  | 1.732000000  | 8.559000000  |
| 1 | -0.228000000 | 2.335000000  | 9.084000000  |
| 6 | -0.285000000 | 1.064000000  | 7.477000000  |
| 1 | -1.194000000 | 1.225000000  | 7.255000000  |
| 6 | 0.455000000  | 0.169000000  | 6.719000000  |
| 1 | 0.041000000  | -0.283000000 | 5.993000000  |
| 6 | 1.793000000  | -0.078000000 | 7.007000000  |
| 1 | 2.295000000  | -0.695000000 | 6.488000000  |
| 6 | 2.377000000  | 0.598000000  | 8.070000000  |
| 6 | 3.762000000  | 0.600000000  | 8.569000000  |
| 6 | 4.880000000  | -0.112000000 | 8.158000000  |
| 1 | 4.827000000  | -0.726000000 | 7.435000000  |
| 6 | 6.079000000  | 0.094000000  | 8.826000000  |
| 1 | 6.851000000  | -0.391000000 | 8.559000000  |
| 6 | 6.171000000  | 0.998000000  | 9.882000000  |
| 1 | 7.005000000  | 1.131000000  | 10.316000000 |
| 6 | 5.053000000  | 1.709000000  | 10.307000000 |
| 1 | 5.111000000  | 2.319000000  | 11.034000000 |
| 6 | 3.849000000  | 1.506000000  | 9.644000000  |
| 6 | 2.822000000  | 3.644000000  | 11.917000000 |

|   |              |              |              |
|---|--------------|--------------|--------------|
| 6 | 3.157000000  | 2.982000000  | 13.186000000 |
| 6 | 3.121000000  | 1.643000000  | 13.565000000 |
| 1 | 2.797000000  | 0.980000000  | 12.967000000 |
| 6 | 3.569000000  | 1.294000000  | 14.841000000 |
| 1 | 3.561000000  | 0.382000000  | 15.106000000 |
| 6 | 4.027000000  | 2.261000000  | 15.727000000 |
| 1 | 4.288000000  | 2.009000000  | 16.605000000 |
| 6 | 4.105000000  | 3.595000000  | 15.341000000 |
| 1 | 4.435000000  | 4.253000000  | 15.941000000 |
| 6 | 3.695000000  | 3.945000000  | 14.067000000 |
| 6 | 3.812000000  | 5.216000000  | 13.350000000 |
| 6 | 4.368000000  | 6.425000000  | 13.736000000 |
| 1 | 4.659000000  | 6.561000000  | 14.629000000 |
| 6 | 4.490000000  | 7.438000000  | 12.785000000 |
| 1 | 4.839000000  | 8.283000000  | 13.042000000 |
| 6 | 4.108000000  | 7.224000000  | 11.467000000 |
| 1 | 4.225000000  | 7.917000000  | 10.827000000 |
| 6 | 3.554000000  | 6.004000000  | 11.070000000 |
| 1 | 3.317000000  | 5.855000000  | 10.162000000 |
| 6 | 3.353000000  | 5.013000000  | 12.024000000 |
| 6 | 0.898000000  | 3.511000000  | 11.275000000 |
| 6 | 0.217000000  | 4.797000000  | 11.051000000 |
| 6 | 0.536000000  | 5.893000000  | 10.255000000 |
| 1 | 1.316000000  | 5.888000000  | 9.712000000  |
| 6 | -0.317000000 | 7.003000000  | 10.269000000 |
| 1 | -0.094000000 | 7.771000000  | 9.757000000  |
| 6 | -1.483000000 | 6.998000000  | 11.022000000 |
| 1 | -2.038000000 | 7.769000000  | 11.032000000 |
| 6 | -1.851000000 | 5.881000000  | 11.761000000 |
| 1 | -2.666000000 | 5.869000000  | 12.250000000 |
| 6 | -1.003000000 | 4.784000000  | 11.770000000 |
| 6 | -1.165000000 | 3.470000000  | 12.394000000 |
| 6 | -2.203000000 | 2.940000000  | 13.147000000 |
| 1 | -2.947000000 | 3.478000000  | 13.391000000 |
| 6 | -2.135000000 | 1.605000000  | 13.538000000 |
| 1 | -2.832000000 | 1.233000000  | 14.066000000 |
| 6 | -1.056000000 | 0.811000000  | 13.162000000 |
| 1 | -1.038000000 | -0.104000000 | 13.415000000 |
| 6 | 0.001000000  | 1.340000000  | 12.419000000 |
| 1 | 0.733000000  | 0.792000000  | 12.162000000 |
| 6 | -0.037000000 | 2.686000000  | 12.060000000 |

**1 at 200 K**

|   |             |             |              |
|---|-------------|-------------|--------------|
| 6 | 2.132000000 | 3.016000000 | 10.875000000 |
| 6 | 2.475000000 | 2.111000000 | 9.956000000  |
| 6 | 1.588000000 | 1.514000000 | 8.935000000  |
| 6 | 0.255000000 | 1.746000000 | 8.643000000  |



|   |              |              |              |
|---|--------------|--------------|--------------|
| 1 | -0.261000000 | 2.345000000  | 9.171000000  |
| 6 | -0.312000000 | 1.085000000  | 7.562000000  |
| 1 | -1.222000000 | 1.243000000  | 7.341000000  |
| 6 | 0.428000000  | 0.199000000  | 6.802000000  |
| 1 | 0.016000000  | -0.248000000 | 6.073000000  |
| 6 | 1.761000000  | -0.046000000 | 7.088000000  |
| 1 | 2.265000000  | -0.658000000 | 6.564000000  |
| 6 | 2.345000000  | 0.622000000  | 8.154000000  |
| 6 | 3.726000000  | 0.623000000  | 8.656000000  |
| 6 | 4.850000000  | -0.083000000 | 8.246000000  |
| 1 | 4.800000000  | -0.695000000 | 7.520000000  |
| 6 | 6.042000000  | 0.122000000  | 8.914000000  |
| 1 | 6.817000000  | -0.359000000 | 8.646000000  |
| 6 | 6.128000000  | 1.016000000  | 9.968000000  |
| 1 | 6.961000000  | 1.147000000  | 10.405000000 |
| 6 | 5.012000000  | 1.723000000  | 10.395000000 |
| 1 | 5.070000000  | 2.330000000  | 11.124000000 |
| 6 | 3.812000000  | 1.522000000  | 9.732000000  |
| 6 | 2.759000000  | 3.641000000  | 12.028000000 |
| 6 | 3.100000000  | 2.979000000  | 13.298000000 |
| 6 | 3.065000000  | 1.645000000  | 13.679000000 |
| 1 | 2.740000000  | 0.980000000  | 13.083000000 |
| 6 | 3.515000000  | 1.299000000  | 14.951000000 |
| 1 | 3.508000000  | 0.387000000  | 15.217000000 |
| 6 | 3.971000000  | 2.263000000  | 15.834000000 |
| 1 | 4.232000000  | 2.012000000  | 16.712000000 |
| 6 | 4.051000000  | 3.591000000  | 15.446000000 |
| 1 | 4.382000000  | 4.250000000  | 16.045000000 |
| 6 | 3.641000000  | 3.943000000  | 14.174000000 |
| 6 | 3.763000000  | 5.210000000  | 13.453000000 |
| 6 | 4.324000000  | 6.417000000  | 13.837000000 |
| 1 | 4.612000000  | 6.555000000  | 14.731000000 |
| 6 | 4.456000000  | 7.420000000  | 12.888000000 |
| 1 | 4.808000000  | 8.264000000  | 13.144000000 |
| 6 | 4.080000000  | 7.208000000  | 11.574000000 |
| 1 | 4.206000000  | 7.898000000  | 10.933000000 |
| 6 | 3.519000000  | 5.993000000  | 11.177000000 |
| 1 | 3.285000000  | 5.843000000  | 10.269000000 |
| 6 | 3.307000000  | 5.007000000  | 12.132000000 |
| 6 | 0.872000000  | 3.518000000  | 11.400000000 |
| 6 | 0.189000000  | 4.803000000  | 11.160000000 |
| 6 | 0.507000000  | 5.888000000  | 10.354000000 |
| 1 | 1.284000000  | 5.875000000  | 9.808000000  |
| 6 | -0.343000000 | 7.000000000  | 10.363000000 |
| 1 | -0.121000000 | 7.764000000  | 9.844000000  |
| 6 | -1.504000000 | 7.001000000  | 11.120000000 |
| 1 | -2.057000000 | 7.774000000  | 11.126000000 |

|   |              |              |              |
|---|--------------|--------------|--------------|
| 6 | -1.869000000 | 5.899000000  | 11.863000000 |
| 1 | -2.683000000 | 5.894000000  | 12.353000000 |
| 6 | -1.026000000 | 4.798000000  | 11.880000000 |
| 6 | -1.198000000 | 3.491000000  | 12.511000000 |
| 6 | -2.241000000 | 2.964000000  | 13.260000000 |
| 1 | -2.984000000 | 3.505000000  | 13.499000000 |
| 6 | -2.184000000 | 1.638000000  | 13.653000000 |
| 1 | -2.885000000 | 1.271000000  | 14.179000000 |
| 6 | -1.111000000 | 0.841000000  | 13.287000000 |
| 1 | -1.098000000 | -0.073000000 | 13.544000000 |
| 6 | -0.052000000 | 1.359000000  | 12.547000000 |
| 1 | 0.676000000  | 0.804000000  | 12.295000000 |
| 6 | -0.075000000 | 2.700000000  | 12.184000000 |

# **1 at 300 K**

|   |              |              |              |
|---|--------------|--------------|--------------|
| 6 | 2.106000000  | 3.015000000  | 10.954000000 |
| 6 | 2.451000000  | 2.123000000  | 10.024000000 |
| 6 | 1.569000000  | 1.532000000  | 9.001000000  |
| 6 | 0.240000000  | 1.762000000  | 8.708000000  |
| 1 | -0.266000000 | 2.346000000  | 9.225000000  |
| 6 | -0.321000000 | 1.104000000  | 7.627000000  |
| 1 | -1.213000000 | 1.256000000  | 7.412000000  |
| 6 | 0.419000000  | 0.229000000  | 6.867000000  |
| 1 | 0.019000000  | -0.205000000 | 6.148000000  |
| 6 | 1.741000000  | -0.014000000 | 7.154000000  |
| 1 | 2.234000000  | -0.612000000 | 6.640000000  |
| 6 | 2.326000000  | 0.648000000  | 8.218000000  |
| 6 | 3.705000000  | 0.649000000  | 8.721000000  |
| 6 | 4.830000000  | -0.052000000 | 8.311000000  |
| 1 | 4.784000000  | -0.648000000 | 7.599000000  |
| 6 | 6.015000000  | 0.152000000  | 8.981000000  |
| 1 | 6.775000000  | -0.316000000 | 8.718000000  |
| 6 | 6.096000000  | 1.036000000  | 10.029000000 |
| 1 | 6.912000000  | 1.164000000  | 10.457000000 |
| 6 | 4.984000000  | 1.739000000  | 10.460000000 |
| 1 | 5.041000000  | 2.329000000  | 11.176000000 |
| 6 | 3.788000000  | 1.541000000  | 9.797000000  |
| 6 | 2.727000000  | 3.636000000  | 12.106000000 |
| 6 | 3.066000000  | 2.979000000  | 13.376000000 |
| 6 | 3.030000000  | 1.648000000  | 13.760000000 |
| 1 | 2.713000000  | 0.995000000  | 13.178000000 |
| 6 | 3.477000000  | 1.308000000  | 15.027000000 |
| 1 | 3.467000000  | 0.416000000  | 15.291000000 |
| 6 | 3.933000000  | 2.268000000  | 15.903000000 |
| 1 | 4.188000000  | 2.024000000  | 16.763000000 |
| 6 | 4.016000000  | 3.588000000  | 15.515000000 |
| 1 | 4.344000000  | 4.232000000  | 16.100000000 |

|   |              |              |              |
|---|--------------|--------------|--------------|
| 6 | 3.606000000  | 3.939000000  | 14.248000000 |
| 6 | 3.735000000  | 5.201000000  | 13.523000000 |
| 6 | 4.296000000  | 6.404000000  | 13.905000000 |
| 1 | 4.576000000  | 6.539000000  | 14.781000000 |
| 6 | 4.434000000  | 7.400000000  | 12.962000000 |
| 1 | 4.782000000  | 8.225000000  | 13.213000000 |
| 6 | 4.064000000  | 7.188000000  | 11.655000000 |
| 1 | 4.194000000  | 7.862000000  | 11.027000000 |
| 6 | 3.497000000  | 5.979000000  | 11.255000000 |
| 1 | 3.269000000  | 5.834000000  | 10.365000000 |
| 6 | 3.279000000  | 5.001000000  | 12.208000000 |
| 6 | 0.851000000  | 3.520000000  | 11.482000000 |
| 6 | 0.172000000  | 4.804000000  | 11.234000000 |
| 6 | 0.492000000  | 5.878000000  | 10.422000000 |
| 1 | 1.252000000  | 5.860000000  | 9.885000000  |
| 6 | -0.355000000 | 6.989000000  | 10.429000000 |
| 1 | -0.140000000 | 7.734000000  | 9.916000000  |
| 6 | -1.508000000 | 6.994000000  | 11.187000000 |
| 1 | -2.046000000 | 7.752000000  | 11.192000000 |
| 6 | -1.875000000 | 5.906000000  | 11.931000000 |
| 1 | -2.672000000 | 5.907000000  | 12.412000000 |
| 6 | -1.038000000 | 4.806000000  | 11.954000000 |
| 6 | -1.214000000 | 3.506000000  | 12.591000000 |
| 6 | -2.257000000 | 2.980000000  | 13.338000000 |
| 1 | -2.984000000 | 3.512000000  | 13.569000000 |
| 6 | -2.205000000 | 1.664000000  | 13.733000000 |
| 1 | -2.894000000 | 1.309000000  | 14.247000000 |
| 6 | -1.143000000 | 0.869000000  | 13.375000000 |
| 1 | -1.134000000 | -0.025000000 | 13.631000000 |
| 6 | -0.085000000 | 1.378000000  | 12.639000000 |
| 1 | 0.625000000  | 0.829000000  | 12.396000000 |
| 6 | -0.097000000 | 2.712000000  | 12.270000000 |

**Cartesian coordinates of 1 optimized by the B3LYP-D3/6-311+G\*\* calculation**

|   |              |              |              |
|---|--------------|--------------|--------------|
| 6 | -0.003530000 | 0.000000000  | -0.507953000 |
| 6 | -0.003106000 | -1.023919000 | 0.528286000  |
| 6 | -0.003106000 | 1.023919000  | 0.528286000  |
| 6 | -1.172106000 | -1.630035000 | 1.165457000  |
| 6 | -2.524212000 | -1.581302000 | 0.833938000  |
| 6 | -3.440827000 | -2.278492000 | 1.625008000  |
| 6 | -3.011968000 | -3.027037000 | 2.723101000  |
| 6 | -1.650531000 | -3.123978000 | 3.032276000  |
| 6 | -0.732976000 | -2.438232000 | 2.248950000  |
| 6 | 0.730810000  | -2.438428000 | 2.247105000  |
| 6 | 1.650216000  | -3.124294000 | 3.028166000  |
| 6 | 3.010885000  | -3.027557000 | 2.715566000  |
| 6 | 3.437126000  | -2.279042000 | 1.616422000  |

|   |              |              |              |
|---|--------------|--------------|--------------|
| 6 | 2.518649000  | -1.581722000 | 0.827636000  |
| 6 | 1.167374000  | -1.630394000 | 1.162492000  |
| 6 | -1.172106000 | 1.630034000  | 1.165457000  |
| 6 | -2.524212000 | 1.581302000  | 0.833939000  |
| 6 | -3.440826000 | 2.278492000  | 1.625009000  |
| 6 | -3.011968000 | 3.027036000  | 2.723102000  |
| 6 | -1.650531000 | 3.123978000  | 3.032277000  |
| 6 | -0.732976000 | 2.438232000  | 2.248950000  |
| 6 | 0.730811000  | 2.438428000  | 2.247105000  |
| 6 | 1.650216000  | 3.124294000  | 3.028166000  |
| 6 | 3.010885000  | 3.027556000  | 2.715566000  |
| 6 | 3.437127000  | 2.279042000  | 1.616422000  |
| 6 | 2.518649000  | 1.581722000  | 0.827636000  |
| 6 | 1.167374000  | 1.630394000  | 1.162493000  |
| 6 | -0.000927000 | 0.000000000  | -1.846063000 |
| 6 | 0.000877000  | -1.180369000 | -2.732882000 |
| 6 | 0.000437000  | -2.540070000 | -2.436767000 |
| 6 | 0.002525000  | -3.455385000 | -3.491888000 |
| 6 | 0.005053000  | -3.015588000 | -4.819066000 |
| 6 | 0.005553000  | -1.651583000 | -5.120848000 |
| 6 | 0.003464000  | -0.734909000 | -4.074644000 |
| 6 | 0.003464000  | 0.734910000  | -4.074644000 |
| 6 | 0.005553000  | 1.651583000  | -5.120848000 |
| 6 | 0.005053000  | 3.015589000  | -4.819066000 |
| 6 | 0.002525000  | 3.455385000  | -3.491888000 |
| 6 | 0.000437000  | 2.540070000  | -2.436767000 |
| 6 | 0.000877000  | 1.180369000  | -2.732882000 |
| 1 | -2.857481000 | -1.046483000 | -0.044194000 |
| 1 | -4.495315000 | -2.246724000 | 1.375787000  |
| 1 | -3.738655000 | -3.559462000 | 3.326210000  |
| 1 | -1.319738000 | -3.741266000 | 3.860371000  |
| 1 | 1.321416000  | -3.741469000 | 3.857137000  |
| 1 | 3.739005000  | -3.560067000 | 3.316869000  |
| 1 | 4.491005000  | -2.247385000 | 1.364618000  |
| 1 | 2.849770000  | -1.046818000 | -0.051266000 |
| 1 | -2.857481000 | 1.046483000  | -0.044194000 |
| 1 | -4.495315000 | 2.246723000  | 1.375788000  |
| 1 | -3.738654000 | 3.559462000  | 3.326211000  |
| 1 | -1.319738000 | 3.741266000  | 3.860371000  |
| 1 | 1.321417000  | 3.741469000  | 3.857138000  |
| 1 | 3.739006000  | 3.560066000  | 3.316868000  |
| 1 | 4.491005000  | 2.247385000  | 1.364618000  |
| 1 | 2.849770000  | 1.046818000  | -0.051266000 |
| 1 | -0.001445000 | -2.884669000 | -1.409782000 |
| 1 | 0.002205000  | -4.518239000 | -3.278984000 |
| 1 | 0.006663000  | -3.742669000 | -5.623436000 |
| 1 | 0.007550000  | -1.317775000 | -6.152584000 |

|   |              |             |              |
|---|--------------|-------------|--------------|
| 1 | 0.007550000  | 1.317776000 | -6.152584000 |
| 1 | 0.006663000  | 3.742669000 | -5.623436000 |
| 1 | 0.002205000  | 4.518239000 | -3.278984000 |
| 1 | -0.001446000 | 2.884669000 | -1.409782000 |

**Raman frequencies (in  $\text{cm}^{-1}$ ) and activities of 1 (B3LYP-D3/6-311+G\*\* optimized). Only frequencies, whose activities are larger than 10, are shown.**

| Frequency | Activity | Frequency | Activity | Frequency | Activity |
|-----------|----------|-----------|----------|-----------|----------|
| 3.8164    | 19.257   | 1134.3    | 16.386   | 1614.2    | 59.879   |
| 26.306    | 13.453   | 1139.5    | 140.83   | 1616.2    | 18.347   |
| 30.19     | 52.636   | 1151.3    | 11.675   | 1633.1    | 737.18   |
| 97.166    | 403.29   | 1184.7    | 212.98   | 1634.6    | 84.825   |
| 138.54    | 42.126   | 1186.3    | 27.187   | 1636.9    | 574.93   |
| 165.25    | 326.05   | 1190.5    | 57.864   | 1640.8    | 138.72   |
| 216.73    | 11.631   | 1198.3    | 104.25   | 1641.6    | 397.59   |
| 296.41    | 34.117   | 1219.5    | 28.48    | 1645.3    | 178.21   |
| 331.63    | 701.76   | 1223      | 535.08   | 1776.8    | 1801.3   |
| 420.26    | 25.716   | 1230.2    | 411.96   | 3160.1    | 45.04    |
| 523.22    | 10.745   | 1232.7    | 43.394   | 3160.2    | 99.559   |
| 567.3     | 289.71   | 1234.1    | 114.44   | 3160.2    | 98.799   |
| 624.32    | 95.79    | 1242.5    | 107.45   | 3171.1    | 22.485   |
| 707.61    | 26.562   | 1317.9    | 247.46   | 3172      | 147.34   |
| 748.55    | 10.55    | 1319.7    | 15.429   | 3172.7    | 338.98   |
| 751.41    | 11.414   | 1321.5    | 87.213   | 3172.9    | 273.13   |
| 752.55    | 47.352   | 1330.9    | 38.5     | 3182.8    | 104.85   |
| 770.67    | 24.177   | 1350      | 770.85   | 3183.3    | 220.31   |
| 773.89    | 66.933   | 1367.8    | 18.204   | 3184.5    | 219.64   |
| 823.07    | 153.97   | 1385.7    | 77.73    | 3184.9    | 206.37   |
| 912.99    | 24.767   | 1388.1    | 40.189   | 3185.5    | 89.872   |
| 1018.3    | 109.24   | 1390.9    | 363.27   | 3186.1    | 1002.4   |
| 1021.9    | 23.397   | 1466.3    | 38.329   | 3193.2    | 18.969   |
| 1024      | 12.762   | 1466.3    | 285.55   | 3193.5    | 444.3    |
| 1039.6    | 14.088   | 1477.1    | 169.96   | 3202.1    | 20.526   |
| 1041.8    | 286.57   | 1496.8    | 60.983   | 3217.1    | 19.788   |
| 1045.7    | 23.585   | 1501.4    | 66.769   | 3217.4    | 160.5    |
| 1054.4    | 28.67    | 1502.8    | 72.003   |           |          |
| 1116.2    | 60.035   | 1508.2    | 550.79   |           |          |
| 1121.4    | 230.81   | 1609.3    | 11.491   |           |          |

**Total energies of the singlet and triplet states of 1 at 90, 100, 200, and 300 K, estimated by the B3LYP-D3/6-311+G\*\* calculation.**

| Temperature (K) | $E_{\text{singlet}}$ (hartree) | $E_{\text{triplet}}$ (hartree) |
|-----------------|--------------------------------|--------------------------------|
| 90              | -1539.1294751                  | -1539.0768378                  |
| 100             | -1538.7717156                  | -1538.7165715                  |
| 200             | -1538.7696856                  | -1538.7068850                  |
| 300             | -1538.6293748                  | -1538.5640721                  |

**Density matrix of the CASSCF(6,6)/6-311G\* calculation for 1 at 90, 100, 200, and 300 K.**

**1 at 90 K**

|   | 1             | 2            | 3            | 4             | 5            |
|---|---------------|--------------|--------------|---------------|--------------|
| 1 | 0.199986D+01  |              |              |               |              |
| 2 | 0.263613D-03  | 0.199982D+01 |              |               |              |
| 3 | -0.283250D-06 | 0.324044D-06 | 0.187249D+01 |               |              |
| 4 | -0.598795D-05 | 0.806092D-05 | 0.181842D-05 | 0.127528D+00  |              |
| 5 | -0.295697D-04 | 0.438654D-04 | 0.106904D-05 | 0.132194D-05  | 0.297083D-03 |
| 6 | -0.799180D-05 | 0.514021D-05 | 0.782966D-05 | -0.407525D-07 | 0.238953D-04 |
| 6 |               |              |              |               |              |
| 6 | 0.170740D-05  |              |              |               |              |

**1 at 100 K**

|   | 1             | 2             | 3            | 4            | 5             |
|---|---------------|---------------|--------------|--------------|---------------|
| 1 | 0.195579D+01  |               |              |              |               |
| 2 | 0.831392D-05  | 0.199997D+01  |              |              |               |
| 3 | 0.199665D-04  | -0.800633D-06 | 0.187529D+01 |              |               |
| 4 | -0.247189D-03 | 0.641701D-04  | 0.101852D-03 | 0.125723D+00 |               |
| 5 | 0.464592D-04  | -0.418088D-04 | 0.137612D-03 | 0.216685D-07 | 0.138816D-04  |
| 6 | 0.460518D-04  | 0.527805D-04  | 0.178357D-03 | 0.234627D-05 | -0.272185D-05 |
| 6 |               |               |              |              |               |
| 6 | 0.432085D-01  |               |              |              |               |

**1 at 200 K**

|   | 1             | 2             | 3             | 4             | 5             |
|---|---------------|---------------|---------------|---------------|---------------|
| 1 | 0.195719D+01  |               |               |               |               |
| 2 | 0.593107D-05  | 0.199998D+01  |               |               |               |
| 3 | 0.118206D-04  | -0.898684D-06 | 0.189044D+01  |               |               |
| 4 | -0.289650D-04 | 0.186170D-05  | 0.323647D-05  | 0.110467D+00  |               |
| 5 | 0.240561D-05  | -0.607816D-06 | 0.368774D-05  | -0.542667D-06 | 0.934101D-05  |
| 6 | 0.348638D-04  | 0.181422D-05  | -0.120558D-04 | 0.900081D-05  | -0.254146D-05 |
| 6 |               |               |               |               |               |
| 6 | 0.419110D-01  |               |               |               |               |

**1 at 300 K**

|   | 1             | 2             | 3            | 4             | 5             |
|---|---------------|---------------|--------------|---------------|---------------|
| 1 | 0.195812D+01  |               |              |               |               |
| 2 | 0.997230D-05  | 0.199997D+01  |              |               |               |
| 3 | 0.129305D-04  | -0.269575D-05 | 0.189428D+01 |               |               |
| 4 | -0.740164D-04 | -0.777337D-06 | 0.309219D-04 | 0.106583D+00  |               |
| 5 | 0.105289D-04  | 0.169538D-05  | 0.386113D-04 | -0.384942D-06 | 0.878242D-05  |
| 6 | 0.409905D-04  | 0.308203D-04  | 0.500721D-04 | 0.688924D-05  | -0.218815D-05 |
| 6 |               |               |              |               |               |
| 6 | 0.410348D-01  |               |              |               |               |

### X-ray crystallographic data

Crystallographic data and structure refinement for **1** (90 K)

|                                                     |                                                                                                    |
|-----------------------------------------------------|----------------------------------------------------------------------------------------------------|
| Data deposition                                     | CCDC 1995679                                                                                       |
| Empirical formula                                   | C <sub>40</sub> H <sub>24</sub>                                                                    |
| Formula weight                                      | 504.49                                                                                             |
| Temperature                                         | 90 K                                                                                               |
| Wavelength                                          | 0.71073                                                                                            |
| Crystal system                                      | monoclinic                                                                                         |
| Space group                                         | <i>P</i> 2 <sub>1</sub> / <i>c</i>                                                                 |
| Unit cell dimensions                                | <i>a</i> = 9.4181(1) Å<br><i>b</i> = 9.0870(1) Å <i>β</i> = 98.5995(8)°<br><i>c</i> = 30.2502(4) Å |
| Volume                                              | 2559.78(5) Å <sup>3</sup>                                                                          |
| <i>Z</i>                                            | 4                                                                                                  |
| Density (calculated)                                | 1.309 Mg/m <sup>3</sup>                                                                            |
| Absorption coefficient                              | 0.074 mm <sup>-1</sup>                                                                             |
| <i>F</i> (000)                                      | 1056.0                                                                                             |
| Crystal size                                        | 0.14 x 0.10 x 0.05 mm <sup>3</sup>                                                                 |
| Theta range for data collection                     | 1.362 to 52.038°                                                                                   |
| Index ranges                                        | −20 ≤ <i>h</i> ≤ 20, −20 ≤ <i>k</i> ≤ 19, −67 ≤ <i>l</i> ≤ 67                                      |
| Reflections collected                               | 151624                                                                                             |
| Independent reflections                             | 19007                                                                                              |
| Completeness                                        | 0.986                                                                                              |
| Absorption correction                               | multi-scan                                                                                         |
| Refinement method                                   | Full-matrix least-squares on <i>F</i> <sup>2</sup>                                                 |
| Data / restraints / parameters                      | 19007 / 0 / 1116                                                                                   |
| Goodness-of-fit on <i>F</i> <sup>2</sup>            | 1.0852                                                                                             |
| Final <i>R</i> indices [ <i>I</i> > 3σ( <i>I</i> )] | <i>R</i> 1 = 0.0284, <i>wR</i> 2 = 0.0517                                                          |
| Largest diff. peak and hole                         | 0.281 and −0.256 e • Å <sup>-3</sup>                                                               |

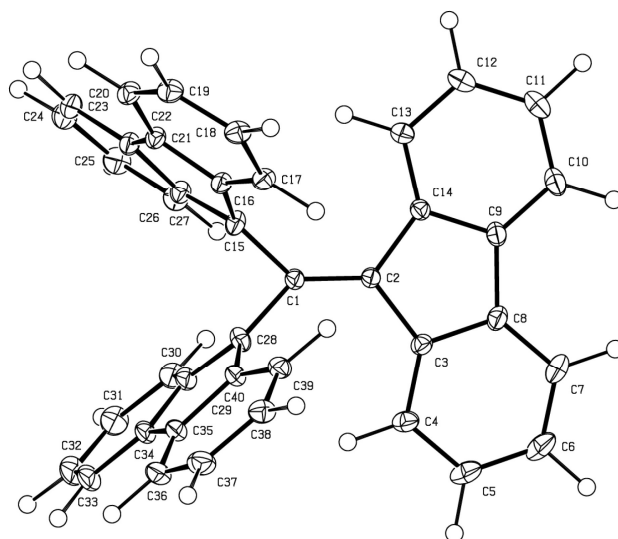

ORTEP drawing of **1** (at 90K). Thermal ellipsoids are drawn at the 50% probability level.

Crystallographic data and structure refinement for **1** (100 K)

|                                                     |                                                                                                        |
|-----------------------------------------------------|--------------------------------------------------------------------------------------------------------|
| Data deposition                                     | CCDC 2062007                                                                                           |
| Empirical formula                                   | C <sub>40</sub> H <sub>24</sub>                                                                        |
| Formula weight                                      | 504.49                                                                                                 |
| Temperature                                         | 100 K                                                                                                  |
| Wavelength                                          | 0.71073                                                                                                |
| Crystal system                                      | monoclinic                                                                                             |
| Space group                                         | <i>P</i> 2 <sub>1</sub> / <i>c</i>                                                                     |
| Unit cell dimensions                                | <i>a</i> = 9.41782(16) Å<br><i>b</i> = 908189(14) Å <i>β</i> = 98.6279(15)°<br><i>c</i> = 30.2784(4) Å |
| Volume                                              | 2560.45(7) Å <sup>3</sup>                                                                              |
| <i>Z</i>                                            | 4                                                                                                      |
| Density (calculated)                                | 1.309 Mg/m <sup>3</sup>                                                                                |
| Absorption coefficient                              | 0.074 mm <sup>-1</sup>                                                                                 |
| <i>F</i> (000)                                      | 1056.0                                                                                                 |
| Crystal size                                        | 0.139 x 0.116 x 0.103 mm <sup>3</sup>                                                                  |
| Theta range for data collection                     | 2.343 to 27.498°                                                                                       |
| Index ranges                                        | −12 ≤ <i>h</i> ≤ 12, −11 ≤ <i>k</i> ≤ 11, −39 ≤ <i>l</i> ≤ 39                                          |
| Reflections collected                               | 55025                                                                                                  |
| Independent reflections                             | 5864                                                                                                   |
| Completeness                                        | 0.999                                                                                                  |
| Absorption correction                               | multi-scan                                                                                             |
| Refinement method                                   | Full-matrix least-squares on <i>F</i> <sup>2</sup>                                                     |
| Data / restraints / parameters                      | 5864 / 0 / 361                                                                                         |
| Goodness-of-fit on <i>F</i> <sup>2</sup>            | 1.046                                                                                                  |
| Final <i>R</i> indices [ <i>I</i> > 2σ( <i>I</i> )] | <i>R</i> 1 = 0.0415, <i>wR</i> 2 = 0.090                                                               |
| Largest diff. peak and hole                         | 0.308 and −0.187 e • Å <sup>-3</sup>                                                                   |

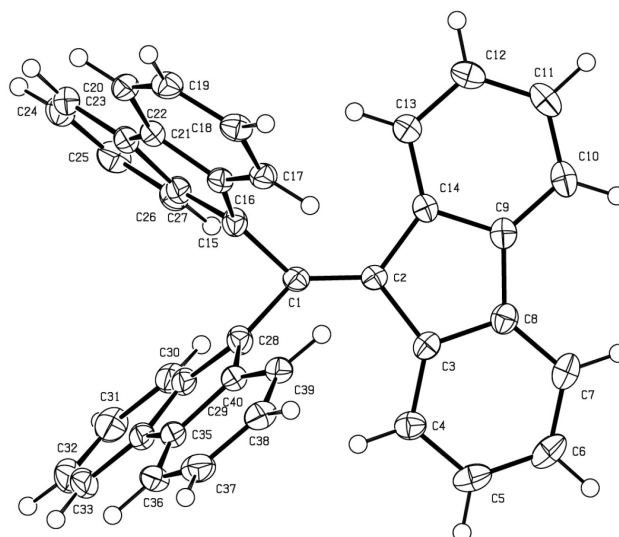

ORTEP drawing of **1** (at 100K). Thermal ellipsoids are drawn at the 50% probability level.



Crystallographic data and structure refinement for **1** (150 K)

|                                                     |                                                                                                    |
|-----------------------------------------------------|----------------------------------------------------------------------------------------------------|
| Data deposition                                     | CCDC 2062017                                                                                       |
| Empirical formula                                   | C <sub>40</sub> H <sub>24</sub>                                                                    |
| Formula weight                                      | 504.49                                                                                             |
| Temperature                                         | 150 K                                                                                              |
| Wavelength                                          | 0.71073                                                                                            |
| Crystal system                                      | monoclinic                                                                                         |
| Space group                                         | <i>P</i> 2 <sub>1</sub> / <i>c</i>                                                                 |
| Unit cell dimensions                                | <i>a</i> = 9.322(2) Å<br><i>b</i> = 9.08269(18) Å <i>β</i> = 98.741(2)°<br><i>c</i> = 30.4391(6) Å |
| Volume                                              | 2577.42(9) Å <sup>3</sup>                                                                          |
| <i>Z</i>                                            | 4                                                                                                  |
| Density (calculated)                                | 1.300 Mg/m <sup>3</sup>                                                                            |
| Absorption coefficient                              | 0.074 mm <sup>-1</sup>                                                                             |
| <i>F</i> (000)                                      | 1056.0                                                                                             |
| Crystal size                                        | 0.139 x 0.116 x 0.103 mm <sup>3</sup>                                                              |
| Theta range for data collection                     | 2.342 to 27.499°                                                                                   |
| Index ranges                                        | −12 ≤ <i>h</i> ≤ 12, −11 ≤ <i>k</i> ≤ 11, −39 ≤ <i>l</i> ≤ 39                                      |
| Reflections collected                               | 55346                                                                                              |
| Independent reflections                             | 5905                                                                                               |
| Completeness                                        | 0.998                                                                                              |
| Absorption correction                               | multi-scan                                                                                         |
| Refinement method                                   | Full-matrix least-squares on <i>F</i> <sup>2</sup>                                                 |
| Data / restraints / parameters                      | 5905 / 0 / 361                                                                                     |
| Goodness-of-fit on <i>F</i> <sup>2</sup>            | 1.042                                                                                              |
| Final <i>R</i> indices [ <i>I</i> > 2σ( <i>I</i> )] | <i>R</i> 1 = 0.0413, <i>wR</i> 2 = 0.0998                                                          |
| Largest diff. peak and hole                         | 0.263 and −0.169 e • Å <sup>-3</sup>                                                               |

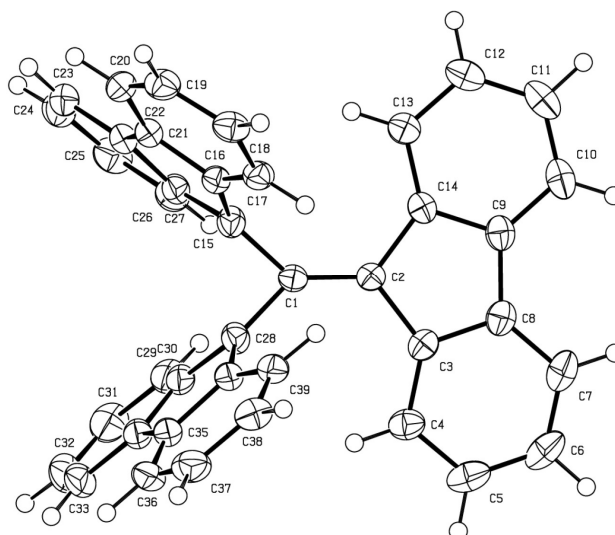

ORTEP drawing of **1** (at 150K). Thermal ellipsoids are drawn at the 50% probability level.

Crystallographic data and structure refinement for **1** (200 K)

|                                                     |                                                                                                         |
|-----------------------------------------------------|---------------------------------------------------------------------------------------------------------|
| Data deposition                                     | CCDC 1995680                                                                                            |
| Empirical formula                                   | C <sub>40</sub> H <sub>24</sub>                                                                         |
| Formula weight                                      | 504.49                                                                                                  |
| Temperature                                         | 200 K                                                                                                   |
| Wavelength                                          | 0.71073                                                                                                 |
| Crystal system                                      | monoclinic                                                                                              |
| Space group                                         | <i>P</i> 2 <sub>1</sub> / <i>c</i>                                                                      |
| Unit cell dimensions                                | <i>a</i> = 9.45015(19) Å<br><i>b</i> = 9.08872(17) Å <i>β</i> = 98.8206(18)°<br><i>c</i> = 30.5831(6) Å |
| Volume                                              | 2595.71(9) Å <sup>3</sup>                                                                               |
| <i>Z</i>                                            | 4                                                                                                       |
| Density (calculated)                                | 1.291 Mg/m <sup>3</sup>                                                                                 |
| Absorption coefficient                              | 0.073 mm <sup>-1</sup>                                                                                  |
| <i>F</i> (000)                                      | 1056.0                                                                                                  |
| Crystal size                                        | 0.139 x 0.116 x 0.103 mm <sup>3</sup>                                                                   |
| Theta range for data collection                     | 2.340 to 27.498°                                                                                        |
| Index ranges                                        | −12 ≤ <i>h</i> ≤ 12, −11 ≤ <i>k</i> ≤ 11, −39 ≤ <i>l</i> ≤ 39                                           |
| Reflections collected                               | 55756                                                                                                   |
| Independent reflections                             | 5941                                                                                                    |
| Completeness                                        | 0.999                                                                                                   |
| Absorption correction                               | multi-scan                                                                                              |
| Refinement method                                   | Full-matrix least-squares on <i>F</i> <sup>2</sup>                                                      |
| Data / restraints / parameters                      | 5941 / 0 / 361                                                                                          |
| Goodness-of-fit on <i>F</i> <sup>2</sup>            | 1.027                                                                                                   |
| Final <i>R</i> indices [ <i>I</i> > 2σ( <i>I</i> )] | <i>R</i> 1 = 0.0423, <i>wR</i> 2 = 0.1021                                                               |
| Largest diff. peak and hole                         | 0.230 and −0.144 e • Å <sup>-3</sup>                                                                    |

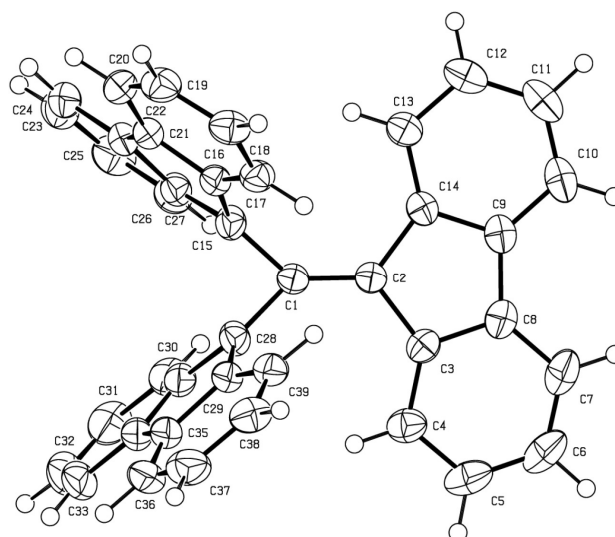

ORTEP drawing of **1** (at 200K). Thermal ellipsoids are drawn at the 50% probability level.

Crystallographic data and structure refinement for **1** (250 K)

|                                                     |                                                                                                  |
|-----------------------------------------------------|--------------------------------------------------------------------------------------------------|
| Data deposition                                     | CCDC 2062018                                                                                     |
| Empirical formula                                   | C <sub>40</sub> H <sub>24</sub>                                                                  |
| Formula weight                                      | 504.49                                                                                           |
| Temperature                                         | 250 K                                                                                            |
| Wavelength                                          | 0.71073                                                                                          |
| Crystal system                                      | monoclinic                                                                                       |
| Space group                                         | <i>P</i> 2 <sub>1</sub> / <i>c</i>                                                               |
| Unit cell dimensions                                | <i>a</i> = 9.4559(2) Å<br><i>b</i> = 9.0809(2) Å $\beta$ = 98.879(2)°<br><i>c</i> = 30.6814(7) Å |
| Volume                                              | 2602.98(10) Å <sup>3</sup>                                                                       |
| <i>Z</i>                                            | 4                                                                                                |
| Density (calculated)                                | 1.288 Mg/m <sup>3</sup>                                                                          |
| Absorption coefficient                              | 0.073 mm <sup>-1</sup>                                                                           |
| <i>F</i> (000)                                      | 1056.0                                                                                           |
| Crystal size                                        | 0.139 x 0.116 x 0.103 mm <sup>3</sup>                                                            |
| Theta range for data collection                     | 2.341 to 27.498°                                                                                 |
| Index ranges                                        | -12 ≤ <i>h</i> ≤ 12, -11 ≤ <i>k</i> ≤ 11, -39 ≤ <i>l</i> ≤ 39                                    |
| Reflections collected                               | 56112                                                                                            |
| Independent reflections                             | 5965                                                                                             |
| Completeness                                        | 0.999                                                                                            |
| Absorption correction                               | multi-scan                                                                                       |
| Refinement method                                   | Full-matrix least-squares on <i>F</i> <sup>2</sup>                                               |
| Data / restraints / parameters                      | 5965 / 0 / 361                                                                                   |
| Goodness-of-fit on <i>F</i> <sup>2</sup>            | 1.024                                                                                            |
| Final <i>R</i> indices [ <i>I</i> > 2σ( <i>I</i> )] | <i>R</i> 1 = 0.0435, <i>wR</i> 2 = 0.1101                                                        |
| Largest diff. peak and hole                         | 0.211 and -0.154 e • Å <sup>-3</sup>                                                             |

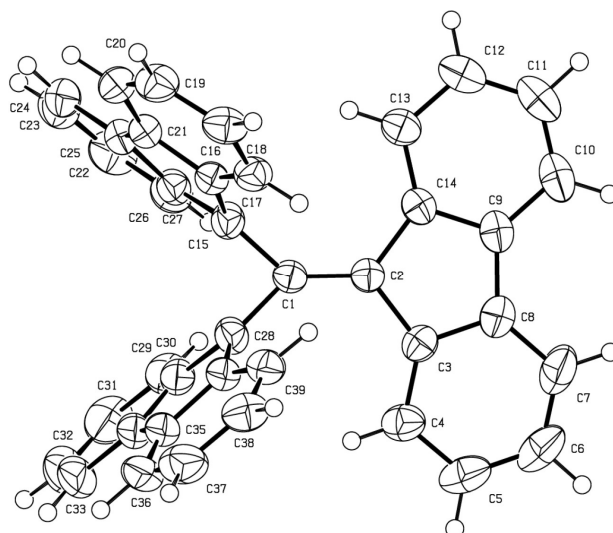

ORTEP drawing of **1** (at 250K). Thermal ellipsoids are drawn at the 50% probability level.

Crystallographic data and structure refinement for **1** (300 K)

|                                                     |                                                                                                  |
|-----------------------------------------------------|--------------------------------------------------------------------------------------------------|
| Data deposition                                     | CCDC 2062019                                                                                     |
| Empirical formula                                   | C <sub>40</sub> H <sub>24</sub>                                                                  |
| Formula weight                                      | 504.49                                                                                           |
| Temperature                                         | 300 K                                                                                            |
| Wavelength                                          | 0.71073                                                                                          |
| Crystal system                                      | monoclinic                                                                                       |
| Space group                                         | <i>P</i> 2 <sub>1</sub> / <i>c</i>                                                               |
| Unit cell dimensions                                | <i>a</i> = 9.4698(2) Å<br><i>b</i> = 9.0813(2) Å $\beta$ = 98.937(2)°<br><i>c</i> = 30.8006(8) Å |
| Volume                                              | 2616.64(11) Å <sup>3</sup>                                                                       |
| <i>Z</i>                                            | 4                                                                                                |
| Density (calculated)                                | 1.282 Mg/m <sup>3</sup>                                                                          |
| Absorption coefficient                              | 0.073 mm <sup>-1</sup>                                                                           |
| <i>F</i> (000)                                      | 1056.0                                                                                           |
| Crystal size                                        | 0.139 x 0.116 x 0.103 mm <sup>3</sup>                                                            |
| Theta range for data collection                     | 2.340 to 27.499°                                                                                 |
| Index ranges                                        | −12 ≤ <i>h</i> ≤ 12, −11 ≤ <i>k</i> ≤ 11, −40 ≤ <i>l</i> ≤ 40                                    |
| Reflections collected                               | 56343                                                                                            |
| Independent reflections                             | 6000                                                                                             |
| Completeness                                        | 0.999                                                                                            |
| Absorption correction                               | multi-scan                                                                                       |
| Refinement method                                   | Full-matrix least-squares on <i>F</i> <sup>2</sup>                                               |
| Data / restraints / parameters                      | 6000 / 0 / 361                                                                                   |
| Goodness-of-fit on <i>F</i> <sup>2</sup>            | 1.035                                                                                            |
| Final <i>R</i> indices [ <i>I</i> > 2σ( <i>I</i> )] | <i>R</i> 1 = 0.0456, <i>wR</i> 2 = 0.1151                                                        |
| Largest diff. peak and hole                         | 0.169 and −0.147 e • Å <sup>-3</sup>                                                             |

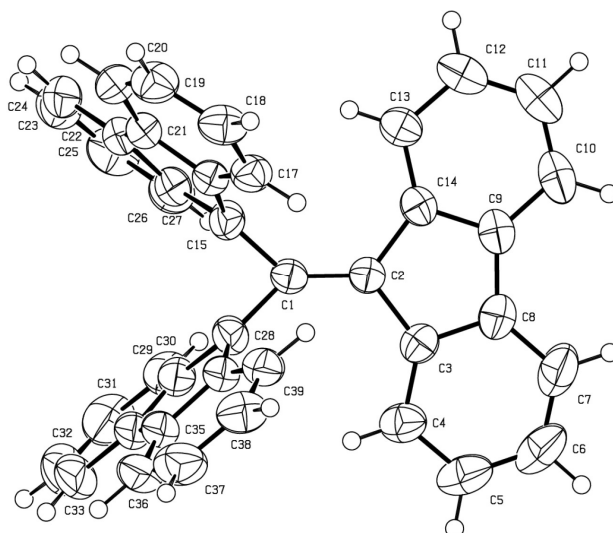

ORTEP drawing of **1** (at 300K). Thermal ellipsoids are drawn at the 50% probability level.

Crystallographic data and structure refinement for **1** (350 K)

|                                                     |                                                                                                   |
|-----------------------------------------------------|---------------------------------------------------------------------------------------------------|
| Data deposition                                     | CCDC 2062024                                                                                      |
| Empirical formula                                   | C <sub>40</sub> H <sub>24</sub>                                                                   |
| Formula weight                                      | 504.49                                                                                            |
| Temperature                                         | 350 K                                                                                             |
| Wavelength                                          | 0.71073                                                                                           |
| Crystal system                                      | monoclinic                                                                                        |
| Space group                                         | <i>P</i> 2 <sub>1</sub> / <i>c</i>                                                                |
| Unit cell dimensions                                | <i>a</i> = 9.5008(2) Å<br><i>b</i> = 9.0966(2) Å <i>β</i> = 99.013(2)°<br><i>c</i> = 30.9861(8) Å |
| Volume                                              | 2644.91(11) Å <sup>3</sup>                                                                        |
| <i>Z</i>                                            | 4                                                                                                 |
| Density (calculated)                                | 1.267 Mg/m <sup>3</sup>                                                                           |
| Absorption coefficient                              | 0.073 mm <sup>-1</sup>                                                                            |
| <i>F</i> (000)                                      | 1056.0                                                                                            |
| Crystal size                                        | 0.139 x 0.116 x 0.103 mm <sup>3</sup>                                                             |
| Theta range for data collection                     | 2.336 to 27.498°                                                                                  |
| Index ranges                                        | −12 ≤ <i>h</i> ≤ 12, −11 ≤ <i>k</i> ≤ 11, −40 ≤ <i>l</i> ≤ 40                                     |
| Reflections collected                               | 57041                                                                                             |
| Independent reflections                             | 6071                                                                                              |
| Completeness                                        | 0.999                                                                                             |
| Absorption correction                               | multi-scan                                                                                        |
| Refinement method                                   | Full-matrix least-squares on <i>F</i> <sup>2</sup>                                                |
| Data / restraints / parameters                      | 6071 / 0 / 361                                                                                    |
| Goodness-of-fit on <i>F</i> <sup>2</sup>            | 1.036                                                                                             |
| Final <i>R</i> indices [ <i>I</i> > 2σ( <i>I</i> )] | <i>R</i> 1 = 0.0476, <i>wR</i> 2 = 0.1194                                                         |
| Largest diff. peak and hole                         | 0.157 and −0.156 e • Å <sup>-3</sup>                                                              |

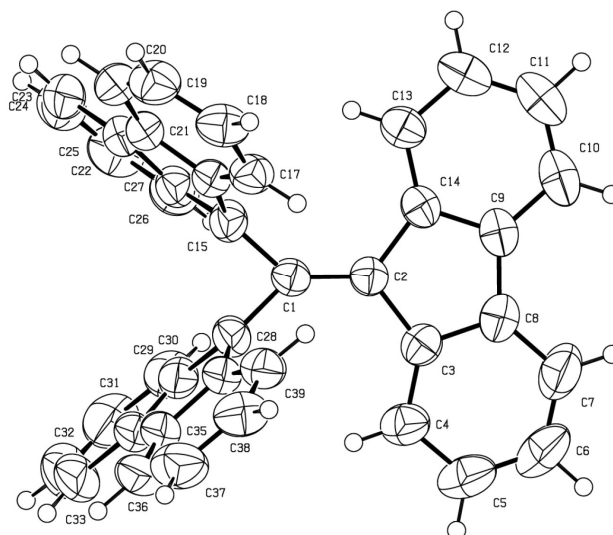

ORTEP drawing of **1** (at 350K). Thermal ellipsoids are drawn at the 50% probability level.

Crystallographic data and structure refinement for **1** (400 K)

|                                                     |                                                                                                   |
|-----------------------------------------------------|---------------------------------------------------------------------------------------------------|
| Data deposition                                     | CCDC 2062025                                                                                      |
| Empirical formula                                   | C <sub>40</sub> H <sub>24</sub>                                                                   |
| Formula weight                                      | 504.49                                                                                            |
| Temperature                                         | 400 K                                                                                             |
| Wavelength                                          | 0.71073                                                                                           |
| Crystal system                                      | monoclinic                                                                                        |
| Space group                                         | <i>P</i> 2 <sub>1</sub> / <i>n</i>                                                                |
| Unit cell dimensions                                | <i>a</i> = 9.5092(3) Å<br><i>b</i> = 9.0954(3) Å $\beta$ = 99.036(3)°<br><i>c</i> = 31.0567(10) Å |
| Volume                                              | 2652.76(15) Å <sup>3</sup>                                                                        |
| <i>Z</i>                                            | 4                                                                                                 |
| Density (calculated)                                | 1.263 Mg/m <sup>3</sup>                                                                           |
| Absorption coefficient                              | 0.072 mm <sup>-1</sup>                                                                            |
| <i>F</i> (000)                                      | 1056.0                                                                                            |
| Crystal size                                        | 0.139 x 0.116 x 0.103 mm <sup>3</sup>                                                             |
| Theta range for data collection                     | 2.336 to 27.499°                                                                                  |
| Index ranges                                        | −12 ≤ <i>h</i> ≤ 12, −11 ≤ <i>k</i> ≤ 11, −40 ≤ <i>l</i> ≤ 40                                     |
| Reflections collected                               | 57128                                                                                             |
| Independent reflections                             | 6089                                                                                              |
| Completeness                                        | 0.999                                                                                             |
| Absorption correction                               | multi-scan                                                                                        |
| Refinement method                                   | Full-matrix least-squares on <i>F</i> <sup>2</sup>                                                |
| Data / restraints / parameters                      | 6089 / 0 / 361                                                                                    |
| Goodness-of-fit on <i>F</i> <sup>2</sup>            | 1.023                                                                                             |
| Final <i>R</i> indices [ <i>I</i> > 2σ( <i>I</i> )] | <i>R</i> 1 = 0.0470, <i>wR</i> 2 = 0.1244                                                         |
| Largest diff. peak and hole                         | 0.153 and −0.144 e • Å <sup>-3</sup>                                                              |

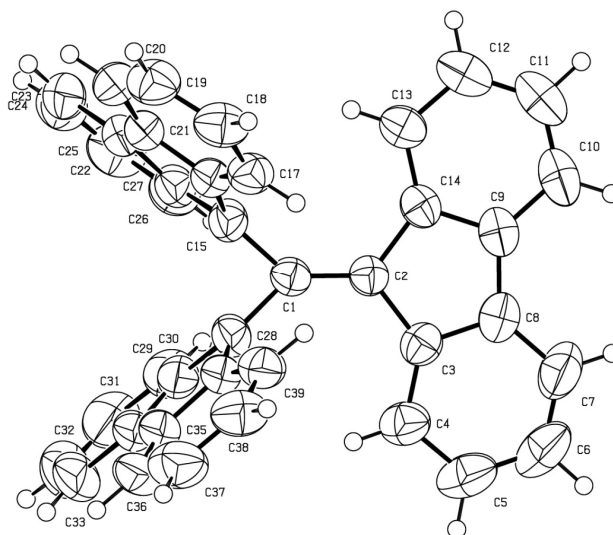

ORTEP drawing of **1** (at 400K). Thermal ellipsoids are drawn at the 50% probability level.

# Crystallographic data and structure refinement for **2a**

|                                                     |                                                                                                     |
|-----------------------------------------------------|-----------------------------------------------------------------------------------------------------|
| Data deposition                                     | CCDC 1995683                                                                                        |
| Empirical formula                                   | C <sub>40</sub> H <sub>26</sub>                                                                     |
| Formula weight                                      | 506.61                                                                                              |
| Temperature                                         | 150 K                                                                                               |
| Wavelength                                          | 0.71075                                                                                             |
| Crystal system                                      | monoclinic                                                                                          |
| Space group                                         | <i>P</i> 2 <sub>1</sub> / <i>n</i>                                                                  |
| Unit cell dimensions                                | <i>a</i> = 16.4306(6) Å<br><i>b</i> = 7.5182(2) Å <i>β</i> = 103.395(7)°<br><i>c</i> = 21.6031(7) Å |
| Volume                                              | 2596.01(16) Å <sup>3</sup>                                                                          |
| <i>Z</i>                                            | 4                                                                                                   |
| Density (calculated)                                | 1.296 Mg/m <sup>3</sup>                                                                             |
| Absorption coefficient                              | 0.073 mm <sup>-1</sup>                                                                              |
| <i>F</i> (000)                                      | 1064.0                                                                                              |
| Crystal size                                        | 0.25 x 0.10 x 0.05 mm <sup>3</sup>                                                                  |
| Theta range for data collection                     | 1.938 to 27.461°                                                                                    |
| Index ranges                                        | −21 ≤ <i>h</i> ≤ 21, −9 ≤ <i>k</i> ≤ 8, −28 ≤ <i>l</i> ≤ 27                                         |
| Reflections collected                               | 23989                                                                                               |
| Independent reflections                             | 5928                                                                                                |
| Completeness                                        | 0.997                                                                                               |
| Absorption correction                               | none                                                                                                |
| Refinement method                                   | Full-matrix least-squares on <i>F</i> <sup>2</sup>                                                  |
| Data / restraints / parameters                      | 4556 / 0 / 465                                                                                      |
| Goodness-of-fit on <i>F</i> <sup>2</sup>            | 1.010                                                                                               |
| Final <i>R</i> indices [ <i>I</i> > 2σ( <i>I</i> )] | <i>R</i> 1 = 0.0434, <i>wR</i> 2 = 0.0930                                                           |
| Largest diff. peak and hole                         | 0.266 and −0.204 e • Å <sup>-3</sup>                                                                |

A level alerts were found in the checkCIF file:

PLAT410\_ALERT\_2\_A Short Intra H...H Contact H2..H26. 1.83 Ang. x,y,z = 1\_555 Check  
 PLAT410\_ALERT\_2\_A Short Intra H...H Contact H11..H27. 1.85 Ang. x,y,z = 1\_555 Check

**Authors response:** The short intramolecular contacts, which were pointed out at 'Alert B level' were found between sterically crowded fluorenylidene and two fluorenyl groups bonded to the central carbon atom, C40. 'H2' and 'H11' are the hydrogen atoms at 1- and 8-positions (C2 and C11, respectively) of the fluorenylidene group, respectively, and 'H26' and 'H27' are those at 9-position of each of two fluorenyl groups (C26 and C27, respectively). The hydrogen atoms were located on the difference Fourier maps and refined their positions and isotropic temperature factors.

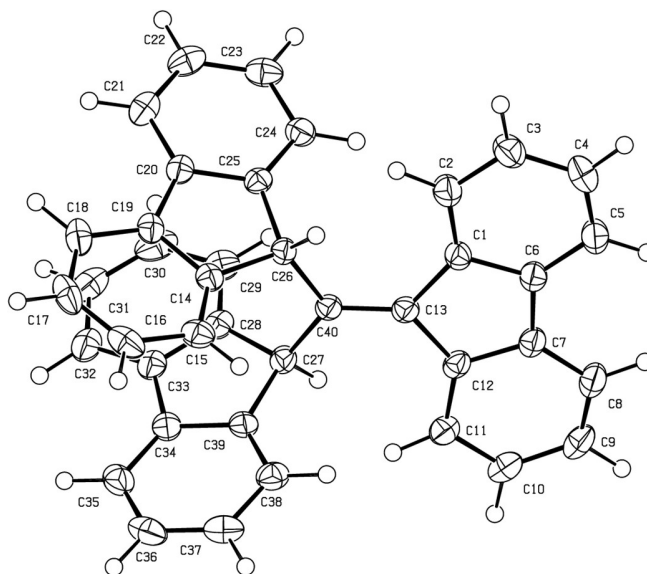

ORTEP drawing of **2a**. Thermal ellipsoids are drawn at the 50% probability level.

#### Crystallographic data and structure refinement for **3**

|                                                     |                                                                                |
|-----------------------------------------------------|--------------------------------------------------------------------------------|
| Data deposition                                     | CCDC 1995682                                                                   |
| Empirical formula                                   | C <sub>72</sub> H <sub>88</sub> Li <sub>2</sub> O <sub>8</sub>                 |
| Formula weight                                      | 1095.30                                                                        |
| Temperature                                         | 200 K                                                                          |
| Wavelength                                          | 0.71075                                                                        |
| Crystal system                                      | orthorhombic                                                                   |
| Space group                                         | <i>P</i> 2 <sub>1</sub> 2 <sub>1</sub> 2 <sub>1</sub>                          |
| Unit cell dimensions                                | <i>a</i> = 17.2782(6) Å<br><i>b</i> = 17.5532(6) Å<br><i>c</i> = 41.2439(12) Å |
| Volume                                              | 12508.8(7) Å <sup>3</sup>                                                      |
| <i>Z</i>                                            | 8                                                                              |
| Density (calculated)                                | 1.163 Mg/m <sup>3</sup>                                                        |
| Absorption coefficient                              | 0.073 mm <sup>-1</sup>                                                         |
| <i>F</i> (000)                                      | 4720.0                                                                         |
| Crystal size                                        | 0.20 x 0.20 x 0.10 mm <sup>3</sup>                                             |
| Theta range for data collection                     | 2.220 to 27.486°                                                               |
| Index ranges                                        | -22 ≤ <i>h</i> ≤ 22, -22 ≤ <i>k</i> ≤ 22, -53 ≤ <i>l</i> ≤ 53                  |
| Reflections collected                               | 113973                                                                         |
| Independent reflections                             | 28667                                                                          |
| Completeness                                        | 1.00                                                                           |
| Absorption correction                               | none                                                                           |
| Refinement method                                   | Full-matrix least-squares on <i>F</i> <sup>2</sup>                             |
| Data / restraints / parameters                      | 11545 / 0 / 1477                                                               |
| Goodness-of-fit on <i>F</i> <sup>2</sup>            | 0.933                                                                          |
| Final <i>R</i> indices [ <i>I</i> > 2σ( <i>I</i> )] | <i>R</i> 1 = 0.0742, <i>wR</i> 2 = 0.1543                                      |
| Largest diff. peak and hole                         | 0.213 and -0.188 e • Å <sup>-3</sup>                                           |



A level alerts were found in the checkCIF file:

PLAT241\_ALERT\_2\_B High 'MainMol' Ueq as Compared to Neighbors of C102 Check

PLAT241\_ALERT\_2\_B High 'MainMol' Ueq as Compared to Neighbors of C110 Check

PLAT242\_ALERT\_2\_B Low 'MainMol' Ueq as Compared to Neighbors of C101 Check

PLAT340\_ALERT\_3\_B Low Bond Precision on C-C Bonds ..... 0.01051 Ang.

**Authors response:** These alerts are a consequence of disorders in a solvent molecule (tetrahydrofuran) coordinated to a lithium ion.

PLAT910\_ALERT\_3\_B Missing # of FCF Reflection(s) Below Theta(Min).

**Authors response:** The unit cell is reasonable large and these low angle reflections are probably missing due to the beam stop.

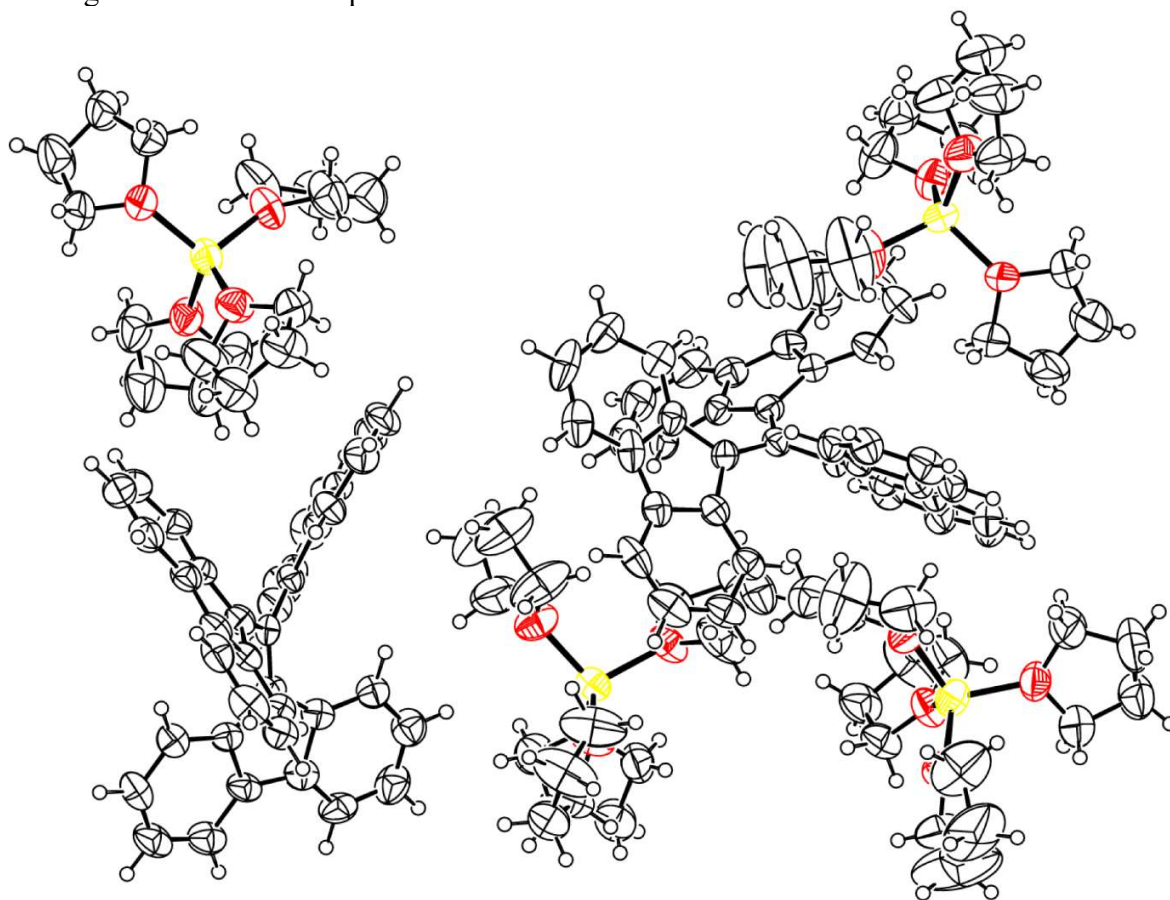

ORTEP drawing of **3**. Thermal ellipsoids are drawn at the 50% probability level.

### Validation of structure of **1** at 90 K

The structure was minutely examined whether the structural modeling was sufficient or not by means of the Hirshfeld's rigid bond test<sup>S9</sup> and the Fourier analysis. In order to avoid the contribution of valence electrons on the structure, we used the structure derived from the high-order refinements for testing. As described in 'X-ray electron density distribution analysis of **1**' section, high order refinements were carried out using 24397 independent reflections with  $\sin\theta/\lambda \geq 0.60 \text{ \AA}^{-1}$ , which is enough to cut the contribution of valence electrons off from the diffraction data (Fig. S16). The C–H distance was constrained at 1.083 Å during the refinements.

On the Hirshfeld's rigid bond test, if  $z^2_{A,B}$  denotes the mean square displacement amplitude of atom A in the direction of atom B, then for every covalently bonded pair of atoms A and B, the difference of mean-squares displacement amplitude, DMSDA ( $\Delta_{A,B}$ ) should be zero, i.e.

$$\Delta_{A,B} = z^2_{A,B} - z^2_{B,A} = 0.$$

According to Hirshfeld, the difference of mean-squares displacement amplitude, DMSDA ( $\Delta_{A,B}$ ), should normally be smaller than  $0.001 \text{ \AA}^2$  if atoms are at least as heavy as carbon. Conversely, if the DMSDA is significantly large, one may deduce that the structural model is insufficient, and a disordered model should be introduced. In the case of **1**, the DMSDAs were calculated to be  $\leq 0.001 \text{ \AA}^2$  for every atomic pair forming chemical bond. The small DMSDAs suggest the structure of **1** was sufficiently described as an ordered structure. Furthermore, the Fourier analysis based on the difference Fourier maps also showed that no remarkable residual density observed at  $\pm 0.1 \text{ e \AA}^{-3}$  level, where  $\Delta\rho_{\min, \max} = -0.230, 0.275 \text{ e \AA}^{-3}$  (Fig. S17). These results clearly indicate that the molecule of **1** adopts the ordered structure in the crystalline state.

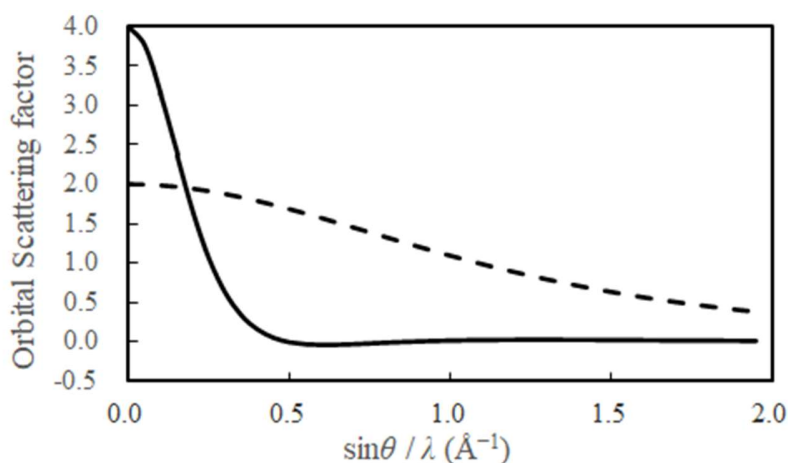

**Fig. S16.**

Orbital scattering factors for carbon atom. Solid and dashed lines indicate contribution of valence and core electrons, respectively. The contribution of valence electrons vanishes above  $0.5 \text{ \AA}^{-1}$  in  $\sin\theta/\lambda$  <sup>S10</sup>.

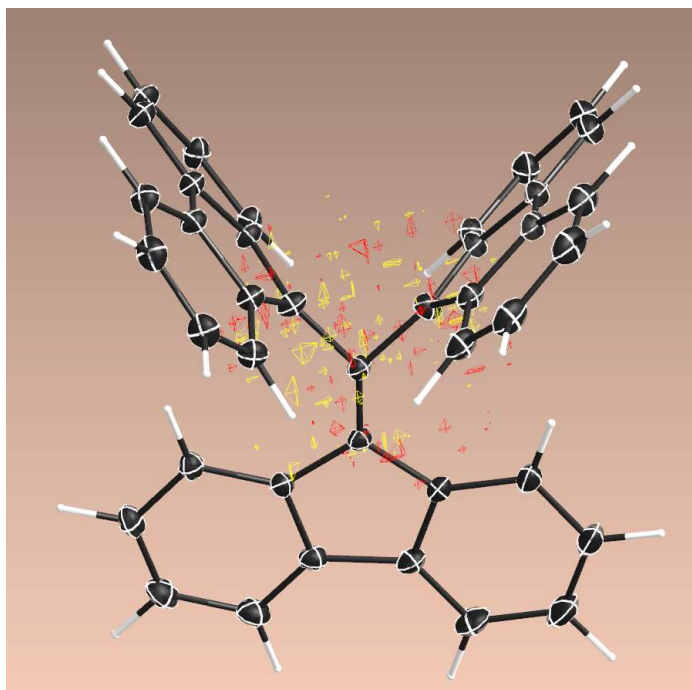

**Fig. S17.**  
3D-isosurface difference Fourier map of **1** at 90 K at  $\pm 0.1 \text{ e } \text{\AA}^{-3}$ . Yellow and red surfaces indicate positive and negative electron density distribution, respectively.

## References

- S1. Gaussian 16, Revision B.01. Frisch, M. J.; Trucks, G. W.; Schlegel, H. B.; Scuseria, G. E.; Robb, M. A.; Cheeseman, J. R.; Scalmani, G.; Barone, V.; Petersson, G. A.; Nakatsuji, H.; Li, X.; Caricato, M.; Marenich, A. V.; Bloino, J.; Janesko, B. G.; Gomperts, R.; Mennucci, B.; Hratchian, H. P.; Ortiz, J. V.; Izmaylov, A. F.; Sonnenberg, J. L.; Williams-Young, D.; Ding, F.; Lipparini, F.; Egidi, F.; Goings, J.; Peng, B.; Petrone, A.; Henderson, T.; Ranasinghe, D.; Zakrzewski, V. G.; Gao, J.; Rega, N.; Zheng, G.; Liang, W.; Hada, M.; Ehara, M.; Toyota, K.; Fukuda, R.; Hasegawa, J.; Ishida, M.; Nakajima, T.; Honda, Y.; Kitao, O.; Nakai, H.; Vreven, T.; Throssell, K.; Montgomery, J. A., Jr.; Peralta, J. E.; Ogliaro, F.; Bearpark, M. J.; Heyd, J. J.; Brothers, E. N.; Kudin, K. N.; Staroverov, V. N.; Keith, T. A.; Kobayashi, R.; Normand, J.; Raghavachari, K.; Rendell, A. P.; Burant, J. C.; Iyengar, S. S.; Tomasi, J.; Cossi, M.; Millam, J. M.; Klene, M.; Adamo, C.; Cammi, R.; Ochterski, J. W.; Martin, R. L.; Morokuma, K.; Farkas, O.; Foresman, J. B.; Fox, D. J. Gaussian, Inc., Wallingford CT (2016).
- S2. Lu, T.; Chen, F. Multiwfn: A multifunctional wavefunction analyzer. *J. Comput. Chem.* **33**, 580–592 (2012).
- S3. HKL2000, Otwinoski, Z.; Minor, W. *Methods in Enzymol.* **276**, 307–326 (1997).
- S4. SHELXT, Sheldrick, G. M. *Acta Crystallogr. Sect. A* **71**, 3–8 (2015).
- S5. Hansen, N. K.; Coppens, P. *Acta Crystallogr. Sect. A* **34**, 909–921 (1978).
- S6. XD2006 – a computer program for multipole refinement, topological analysis of charge densities and evaluation of intermolecular energies from experimental or theoretical structure factors. Volkov, A.; Macchi, P.; Farrugia, L. J.; Gatti, C.; Mallinson, P. R.; Richter, T.; Koritsanszky, T. (2006).
- S7. Lodewyk, M. W.; Siebert, M. R.; Tantillo, D. J. *Chem. Rev.* **112**, 1839–1862 (2012).
- S8. Winkler, M.; Sander, W. *J. Phys. Chem. A* **105**, 10422–10432 (2001).
- S9. Hirshfeld, F. L. *Acta Crystallogr. Sect. A*, **A32**, 239–244 (1976).
- S10. Macchi, P.; Coppens, P. *Acta Crystallogr. Sect. A*, **A57**, 656–662 (2001).
